# Supplementary material for: New Cembranoids and a Biscembranoid Peroxide from the Soft Coral Sarcophyton cherbonnieri
Source: PubMed Central journal article supplement (PMC6117711; doi:10.3390/md16080276), 2018-08-06
Supplement: marinedrugs-16-00276-s001.pdf [file marinedrugs-16-00276-s001.pdf]

## Supplementary information

### New Cembranoids and a Biscembranoid Peroxide from the Soft Coral *Sarcophyton cherbonnieri*

Chia-Chi Peng <sup>1</sup>, Chiung-Yao Huang <sup>1</sup>, Atallah F. Ahmed <sup>2,3</sup>, Tsong-Long Hwang <sup>4,5,6</sup>, Chang-Feng Dai <sup>7</sup>, Jyh-Horng Sheu <sup>1,8,9,10,\*</sup>

<sup>1</sup> Department of Marine Biotechnology and Resources, National Sun Yat-sen University, Kaohsiung 804, Taiwan; m045020008@mail.nsysu.edu.tw (C.-C. P); huangcy@mail.nsysu.edu.tw (C.-Y.H.)

<sup>2</sup> Department of Pharmacognosy, College of Pharmacy, King Saud University, Riyadh 11451, Saudi Arabia; afahmed@ksu.edu.sa

<sup>3</sup> Department of Pharmacognosy, Faculty of Pharmacy, Mansoura University, Mansoura 35516, Egypt

<sup>4</sup> Graduate Institute of Natural Products, College of Medicine, Chang Gung University, Taoyuan 333, Taiwan

<sup>5</sup> Research Center for Industry of Human Ecology and Graduate Institute of Health Industry Technology, Chang Gung University of Science and Technology, Taoyuan 333, Taiwan

<sup>6</sup> Department of Anesthesiology, Chang Gung Memorial Hospital, Taoyuan 333, Taiwan; htl@mail.cgu.edu.tw

<sup>7</sup> Institute of Oceanography, National Taiwan University, Taipei 112, Taiwan; corallab@ntu.edu.tw

<sup>8</sup> Graduate Institute of Natural Products, Kaohsiung Medical University, Kaohsiung 807, Taiwan

<sup>9</sup> Frontier Center for Ocean Science and Technology, National Sun Yat-sen University, Kaohsiung 804, Taiwan

<sup>10</sup> Department of Medical Research, China Medical University Hospital, China Medical University, Taichung 404, Taiwan

\* Correspondence: sheu@mail.nsysu.edu.tw

## Table of Contents

|            |                                                                                           |     |
|------------|-------------------------------------------------------------------------------------------|-----|
| Figure S1  | HRESIMS spectrum of <b>1</b>                                                              | S4  |
| Figure S2  | <sup>1</sup> H NMR spectrum of <b>1</b> in CDCl <sub>3</sub>                              | S5  |
| Figure S3  | <sup>13</sup> C NMR spectrum of <b>1</b> in CDCl <sub>3</sub>                             | S6  |
| Figure S4  | HSQC spectrum of <b>1</b> in CDCl <sub>3</sub>                                            | S7  |
| Figure S5  | <sup>1</sup> H- <sup>1</sup> H COSY spectrum of <b>1</b> in CDCl <sub>3</sub>             | S8  |
| Figure S6  | HMBC spectrum of <b>1</b> in CDCl <sub>3</sub>                                            | S9  |
| Figure S7  | NOESY spectrum of <b>1</b> in CDCl <sub>3</sub>                                           | S10 |
| Figure S8  | HRESIMS spectrum of <b>2</b>                                                              | S11 |
| Figure S9  | <sup>1</sup> H NMR spectrum of <b>2</b> in CDCl <sub>3</sub>                              | S12 |
| Figure S10 | <sup>13</sup> C NMR spectrum of <b>2</b> in CDCl <sub>3</sub>                             | S13 |
| Figure S11 | HSQC spectrum of <b>2</b> in CDCl <sub>3</sub>                                            | S14 |
| Figure S12 | <sup>1</sup> H- <sup>1</sup> H COSY spectrum of <b>2</b> in CDCl <sub>3</sub>             | S15 |
| Figure S13 | HMBC spectrum of <b>2</b> in CDCl <sub>3</sub>                                            | S16 |
| Figure S14 | NOESY spectrum of <b>2</b> in CDCl <sub>3</sub>                                           | S17 |
| Figure S15 | HRESIMS spectrum of <b>3</b>                                                              | S18 |
| Figure S16 | <sup>1</sup> H NMR spectrum of <b>3</b> in C <sub>6</sub> D <sub>6</sub>                  | S19 |
| Figure S17 | <sup>13</sup> C NMR spectrum of <b>3</b> in C <sub>6</sub> D <sub>6</sub>                 | S20 |
| Figure S18 | HSQC spectrum of <b>3</b> in C <sub>6</sub> D <sub>6</sub>                                | S21 |
| Figure S19 | <sup>1</sup> H- <sup>1</sup> H COSY spectrum of <b>3</b> in C <sub>6</sub> D <sub>6</sub> | S22 |
| Figure S20 | HMBC spectrum of <b>3</b> in C <sub>6</sub> D <sub>6</sub>                                | S23 |
| Figure S21 | NOESY spectrum of <b>3</b> in C <sub>6</sub> D <sub>6</sub>                               | S24 |
| Figure S22 | HRESIMS spectrum of <b>4</b>                                                              | S25 |
| Figure S23 | <sup>1</sup> H NMR spectrum of <b>4</b> in C <sub>6</sub> D <sub>6</sub>                  | S26 |
| Figure S24 | <sup>13</sup> C NMR spectrum of <b>4</b> in C <sub>6</sub> D <sub>6</sub>                 | S27 |
| Figure S25 | HSQC spectrum of <b>4</b> in C <sub>6</sub> D <sub>6</sub>                                | S28 |
| Figure S26 | <sup>1</sup> H- <sup>1</sup> H COSY spectrum of <b>4</b> in C <sub>6</sub> D <sub>6</sub> | S29 |
| Figure S27 | HMBC spectrum of <b>4</b> in C <sub>6</sub> D <sub>6</sub>                                | S30 |
| Figure S28 | NOESY spectrum of <b>4</b> in C <sub>6</sub> D <sub>6</sub>                               | S31 |
| Figure S29 | HRESIMS spectrum of <b>5</b>                                                              | S32 |
| Figure S30 | <sup>1</sup> H NMR spectrum of <b>5</b> in C <sub>6</sub> D <sub>6</sub>                  | S33 |
| Figure S31 | <sup>13</sup> C NMR spectrum of <b>5</b> in C <sub>6</sub> D <sub>6</sub>                 | S34 |
| Figure S32 | HSQC spectrum of <b>5</b> in C <sub>6</sub> D <sub>6</sub>                                | S35 |
| Figure S33 | <sup>1</sup> H- <sup>1</sup> H COSY spectrum of <b>5</b> in C <sub>6</sub> D <sub>6</sub> | S36 |
| Figure S34 | HMBC spectrum of <b>5</b> in C <sub>6</sub> D <sub>6</sub>                                | S37 |
| Figure S35 | NOESY spectrum of <b>5</b> in C <sub>6</sub> D <sub>6</sub>                               | S38 |
| Figure S36 | HRESIMS spectrum of <b>6</b>                                                              | S39 |
| Figure S37 | ESIMS spectrum of <b>6</b>                                                                | S40 |
| Figure S38 | <sup>1</sup> H NMR spectrum of <b>6</b> in CDCl <sub>3</sub>                              | S41 |

|            |                                                                                                                           |     |
|------------|---------------------------------------------------------------------------------------------------------------------------|-----|
| Figure S39 | $^{13}\text{C}$ NMR spectrum of <b>6</b> in $\text{CDCl}_3$                                                               | S42 |
| Figure S40 | HSQC spectrum of <b>6</b> in $\text{CDCl}_3$                                                                              | S43 |
| Figure S41 | $^1\text{H}$ - $^1\text{H}$ COSY spectrum of <b>6</b> in $\text{CDCl}_3$                                                  | S44 |
| Figure S42 | HMBC spectrum of <b>6</b> in $\text{CDCl}_3$                                                                              | S45 |
| Figure S43 | NOESY spectrum of <b>6</b> in $\text{CDCl}_3$                                                                             | S46 |
| Figure S44 | $^1\text{H}$ NMR spectrum of (+)-sarcophytoxide in $\text{CDCl}_3$ before treatment with acetone and silica gel under air | S47 |
| Figure S45 | $^1\text{H}$ NMR spectrum of (+)-sarcophytoxide in $\text{CDCl}_3$ after treatment with acetone and silica gel under air  | S48 |
| Figure S46 | $^1\text{H}$ NMR spectrum of sarcophytonin A in $\text{CDCl}_3$ before treatment with acetone and silica gel under air    | S49 |
| Figure S47 | $^1\text{H}$ NMR spectrum of sarcophytonin A in $\text{CDCl}_3$ after treatment with acetone and silica gel under air     | S50 |

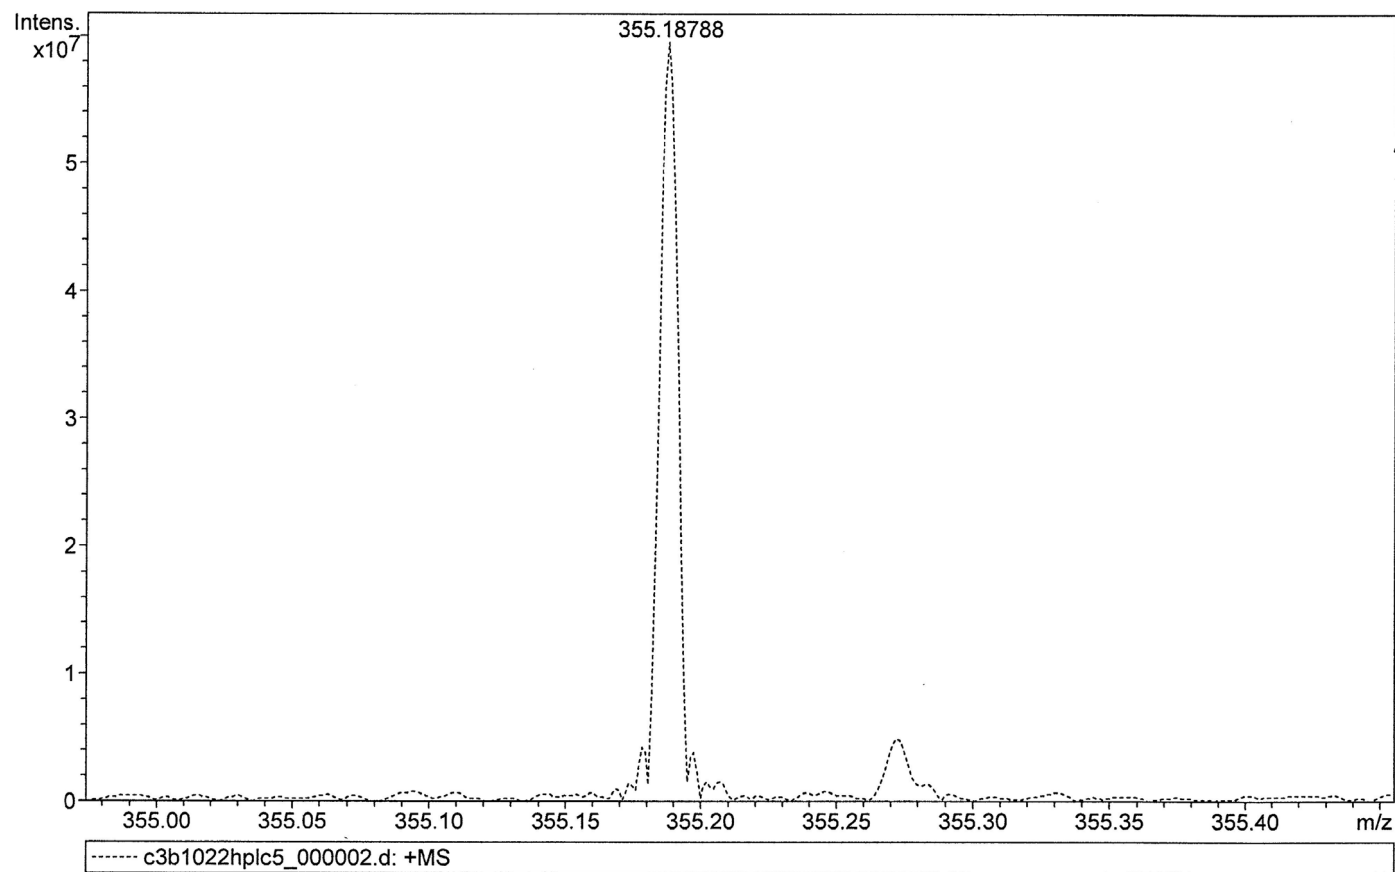

| Meas. m/z | # | Formula                                          | Score  | m/z       | err [mDa] | err [ppm] | mSigma | rdb | e <sup>-</sup> | Conf | N-Rule |
|-----------|---|--------------------------------------------------|--------|-----------|-----------|-----------|--------|-----|----------------|------|--------|
| 355.18788 | 1 | C <sub>20</sub> H <sub>28</sub> NaO <sub>4</sub> | 100.00 | 355.18798 | 0.10      | 0.29      | 5.9    | 6.5 | even           |      | ok     |

**Figure S1.** HRESIMS spectrum of **1**



Pulse Sequence: PROTON (s2pu1)  
Solvent: cdc13  
Data collected on: Apr 24 2015

入王

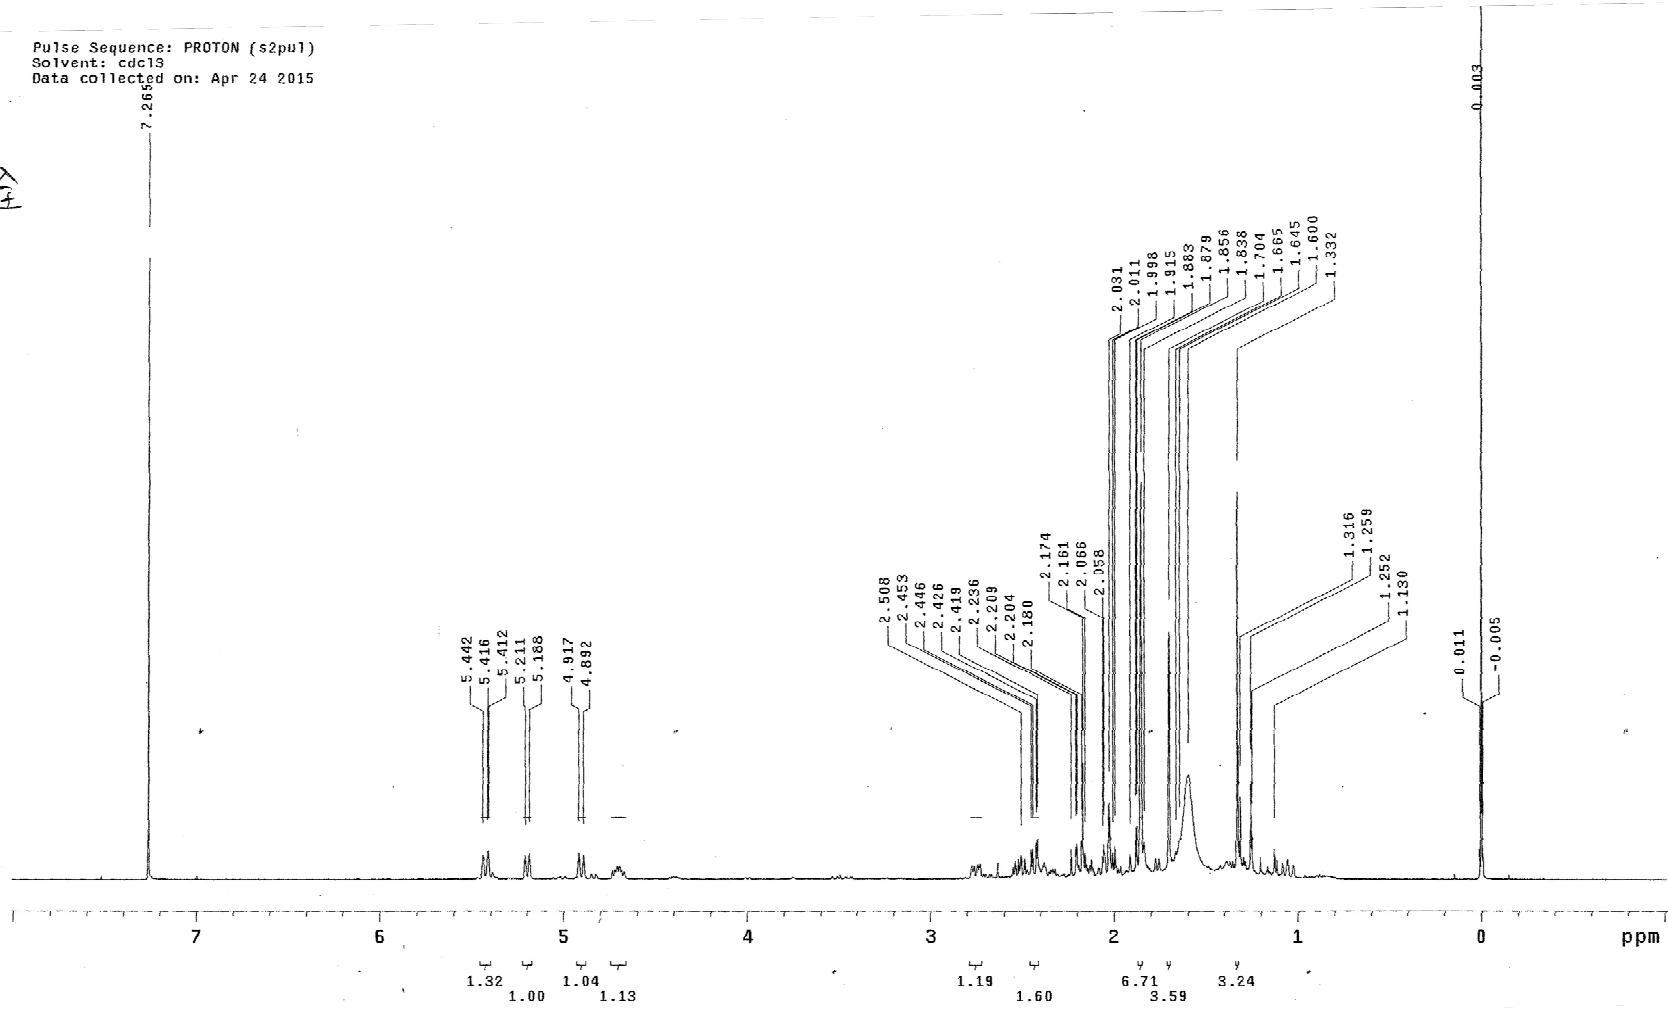

Figure S2. <sup>1</sup>H NMR spectrum of **1** in CDCl<sub>3</sub>  
S5

Sample Name:  
c3b-10-2-2-hplc\_5  
Data Collected on:  
Varian-NMR-vnmrs400  
Archive directory:  
/home/sheu/vnmrsys/data  
Sample directory:

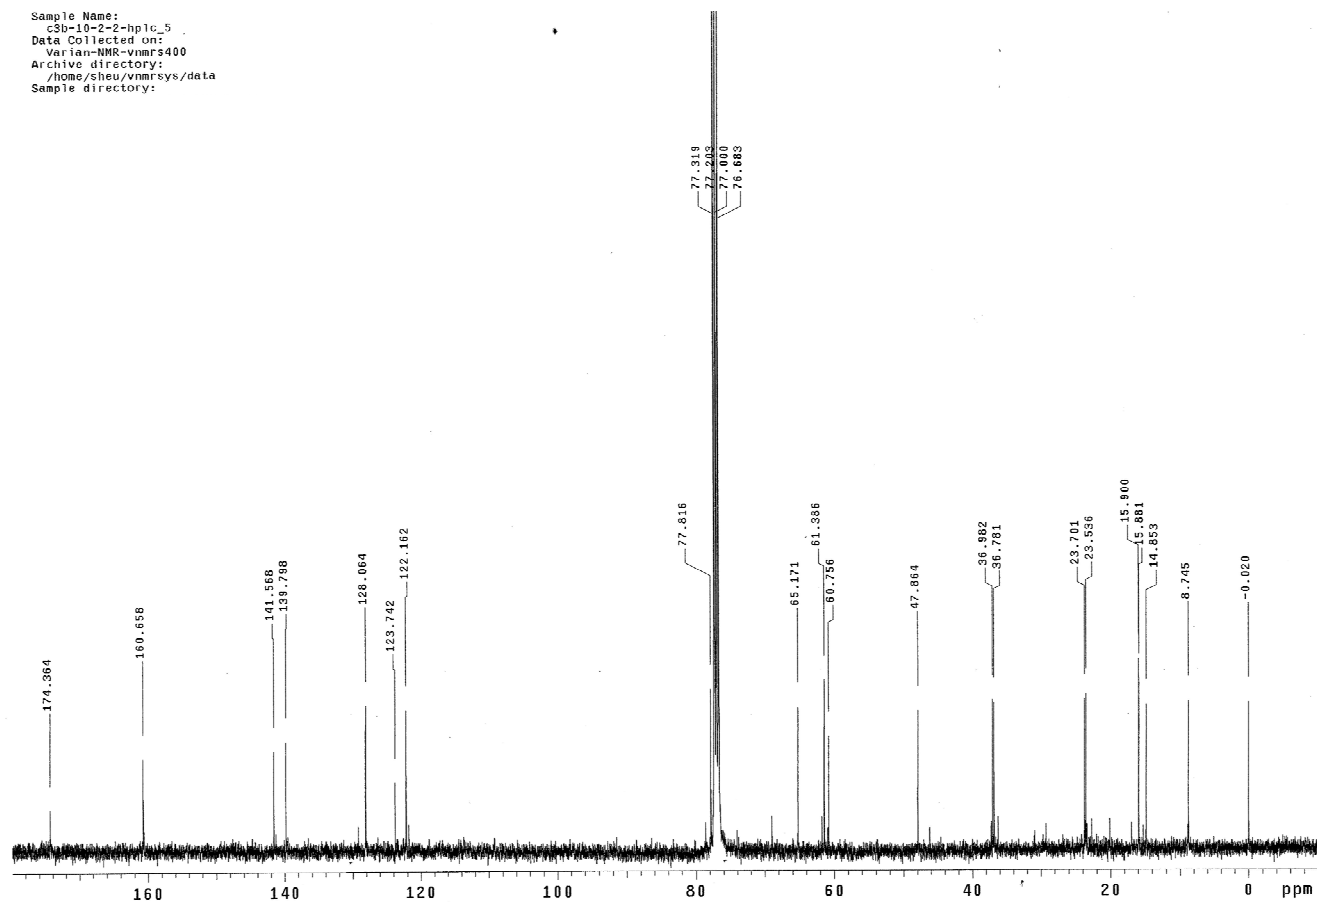

Figure S3.  $^{13}\text{C}$  NMR spectrum of 1 in  $\text{CDCl}_3$

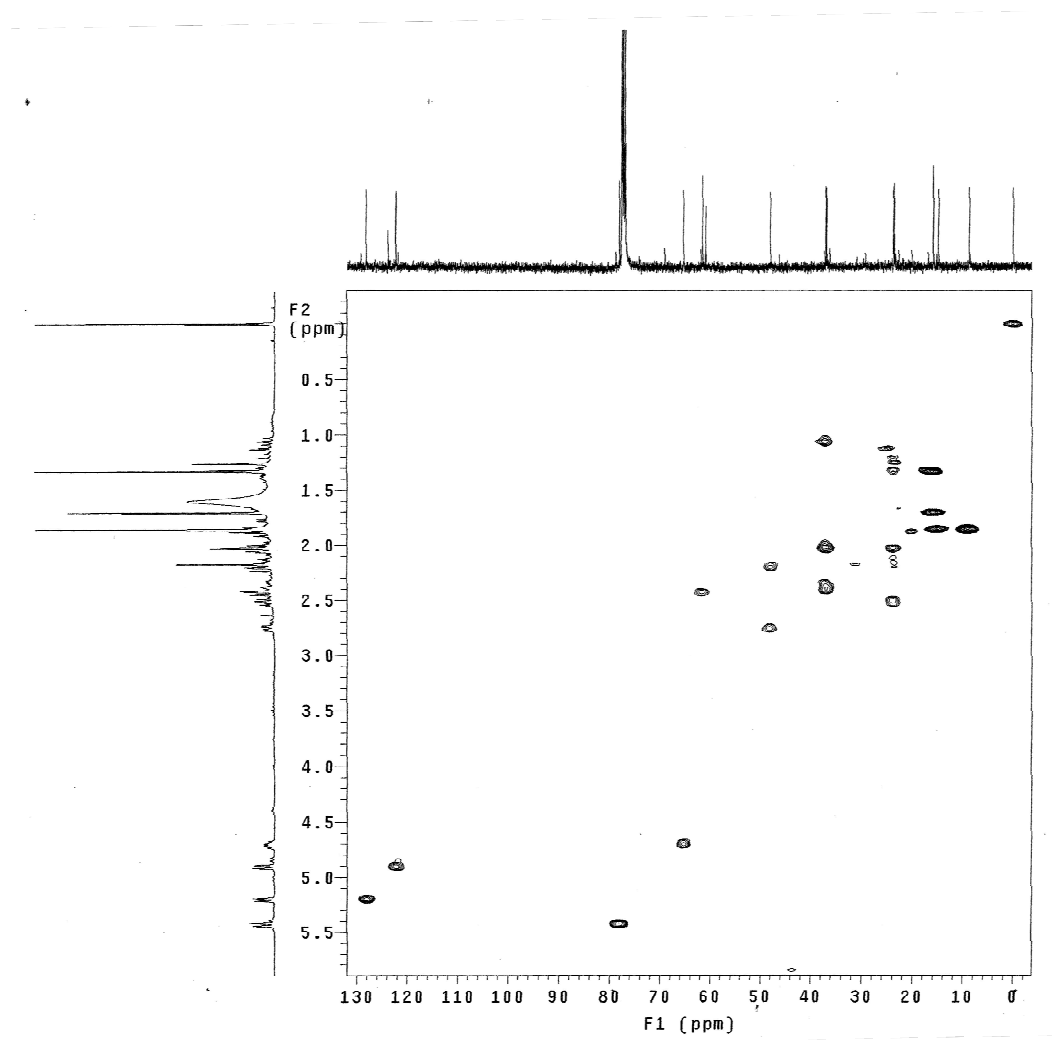

Figure S4. HSQC spectrum of 1 in CDCl<sub>3</sub>

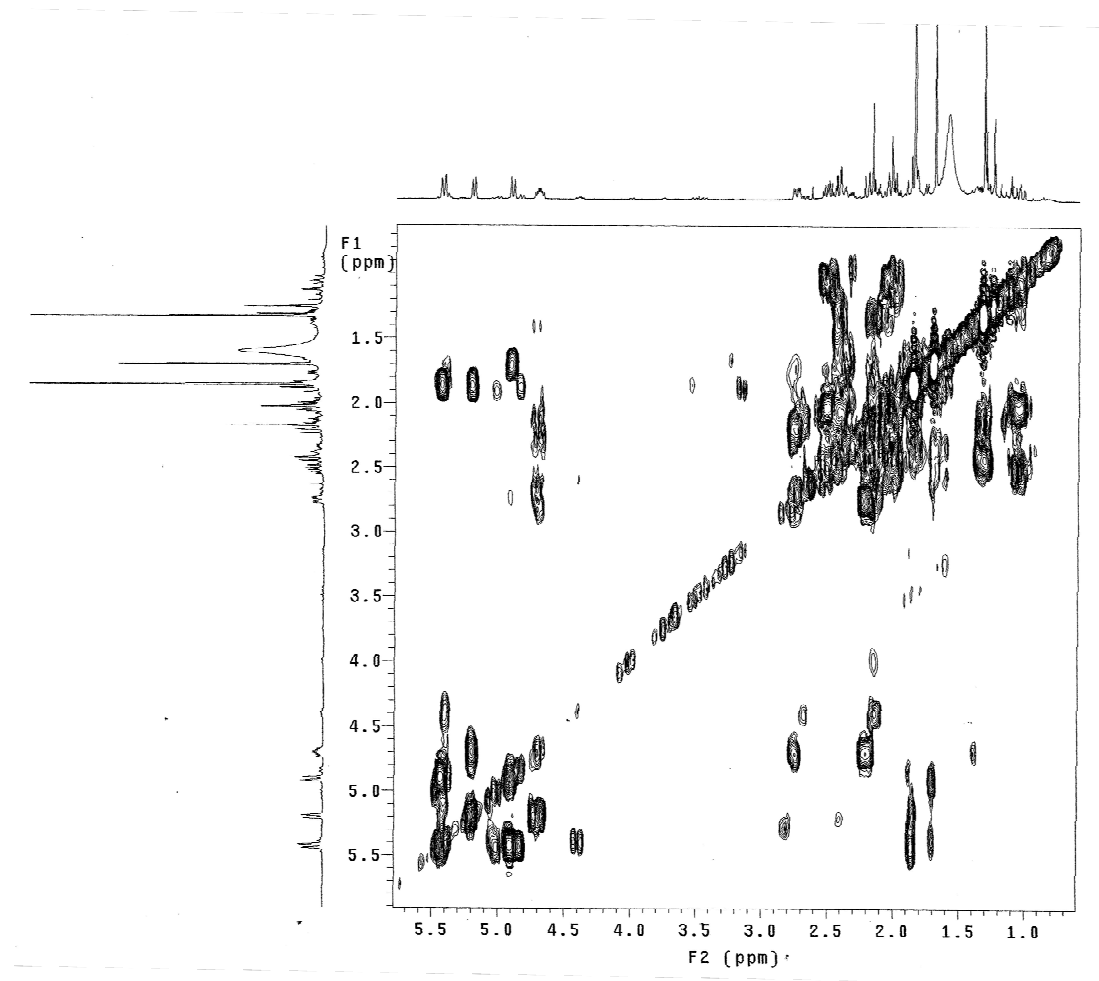

Figure S5.  $^1\text{H}$ - $^1\text{H}$  COSY spectrum of **1** in  $\text{CDCl}_3$

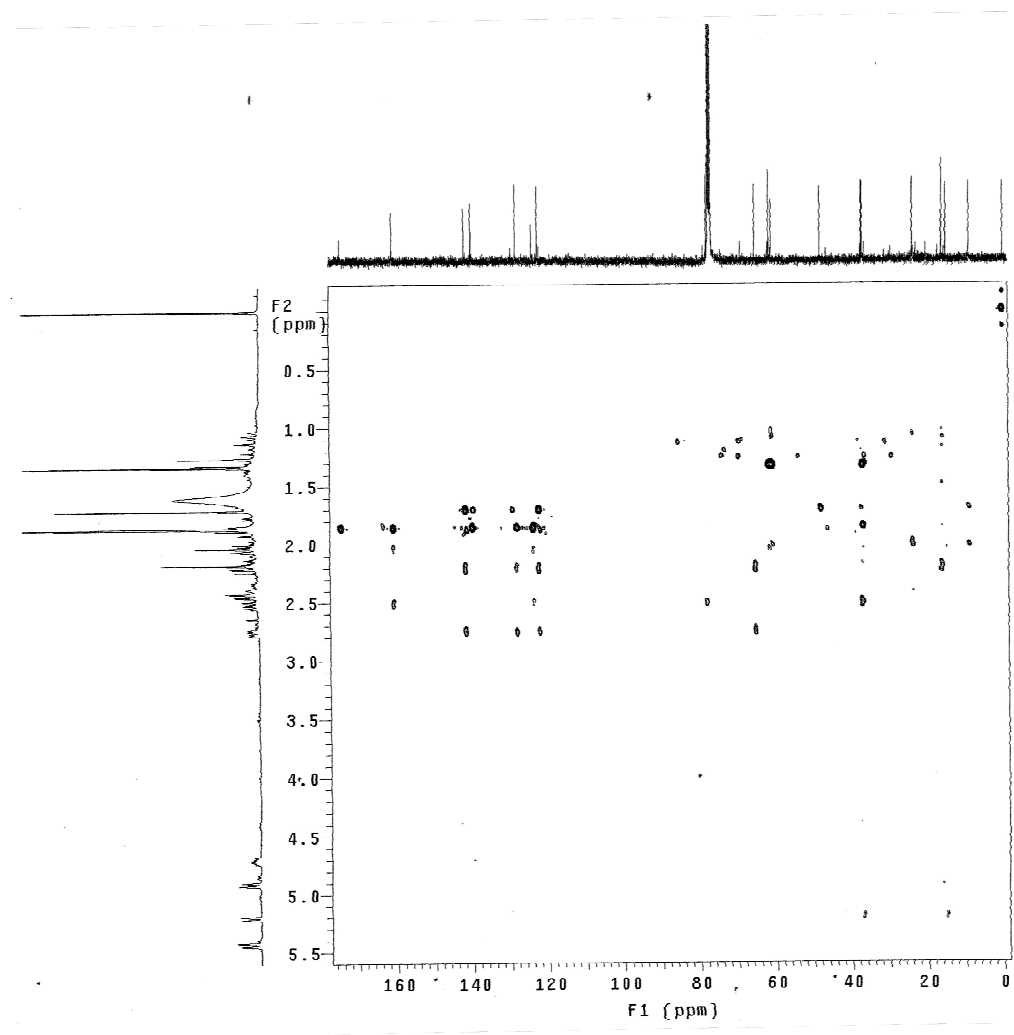

Figure S6. HMBC spectrum of 1 in CDCl<sub>3</sub>

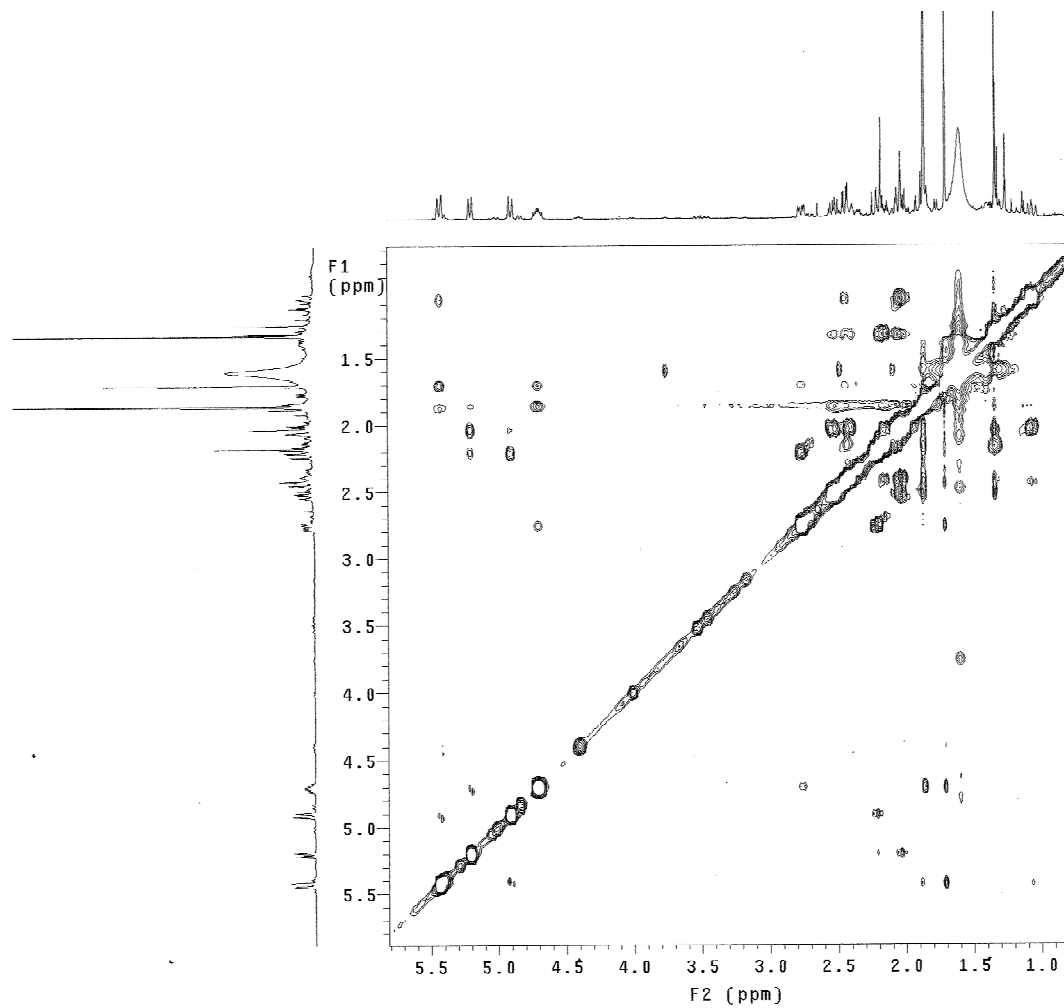

**Figure S7.** NOESY spectrum of **1** in  $\text{CDCl}_3$

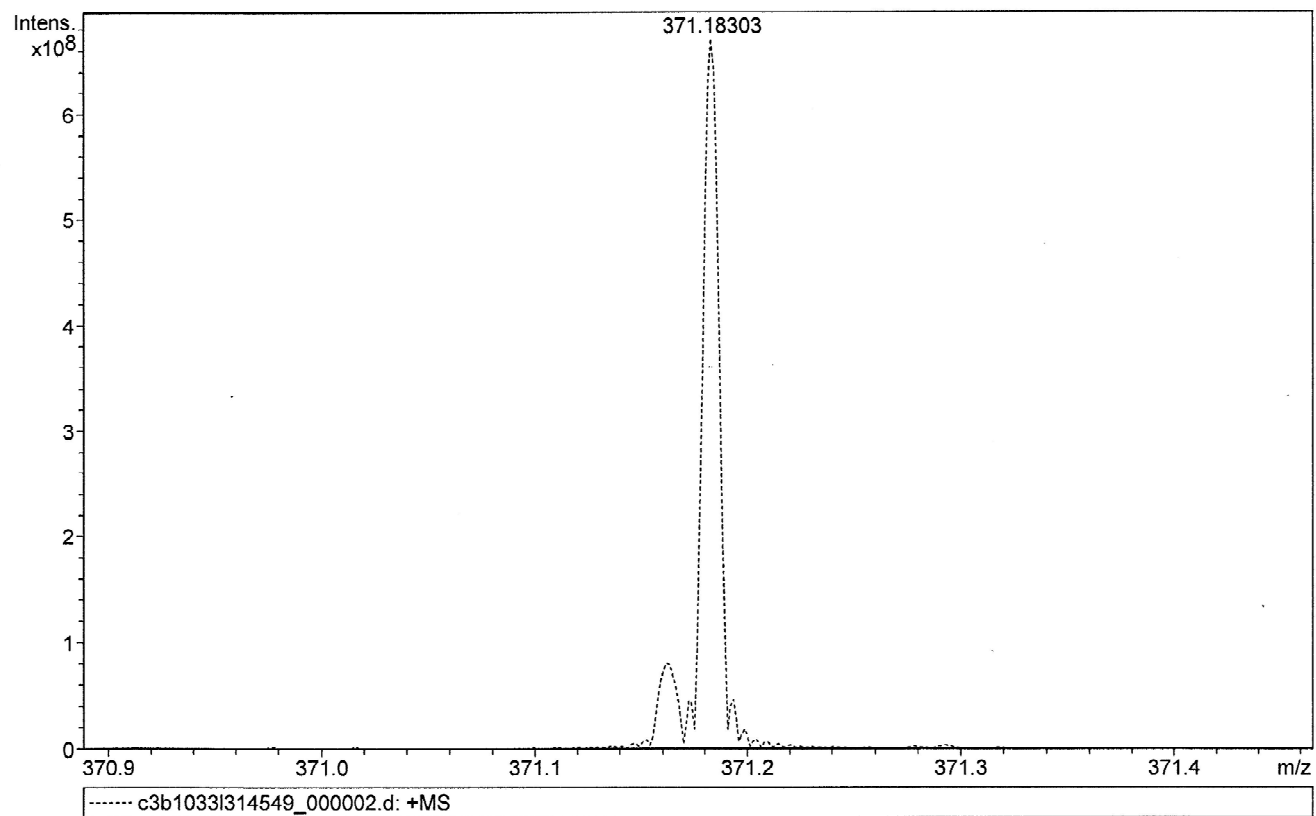

**Figure S8.** HRESIMS spectrum of **2**

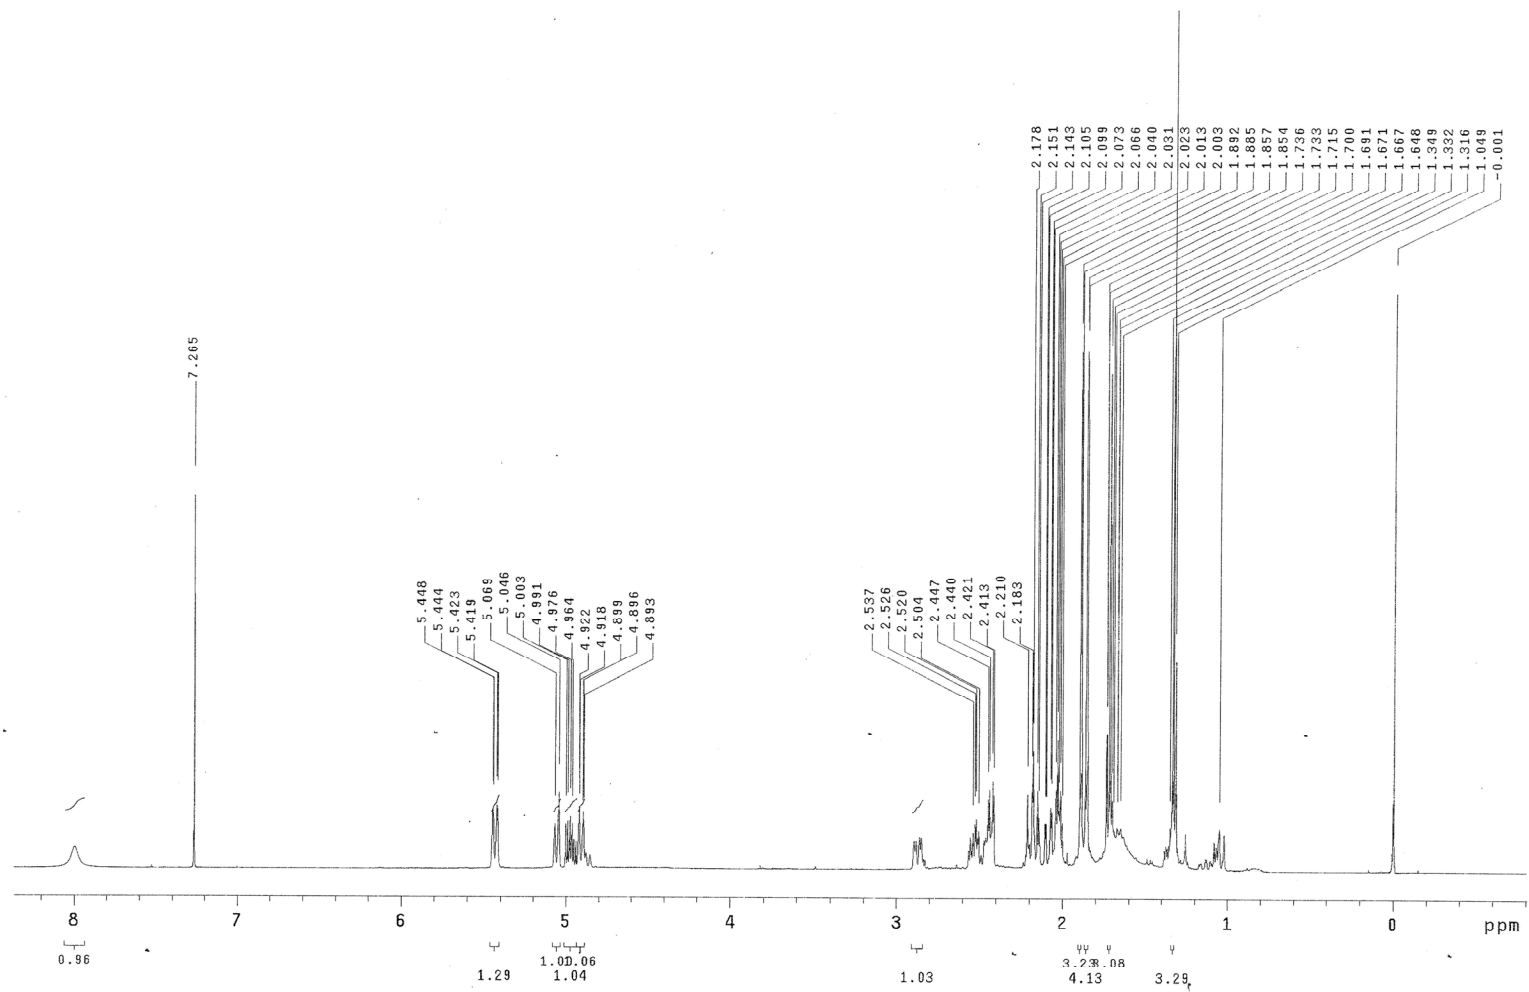

Figure S9.  $^1\text{H}$  NMR spectrum of **2** in  $\text{CDCl}_3$



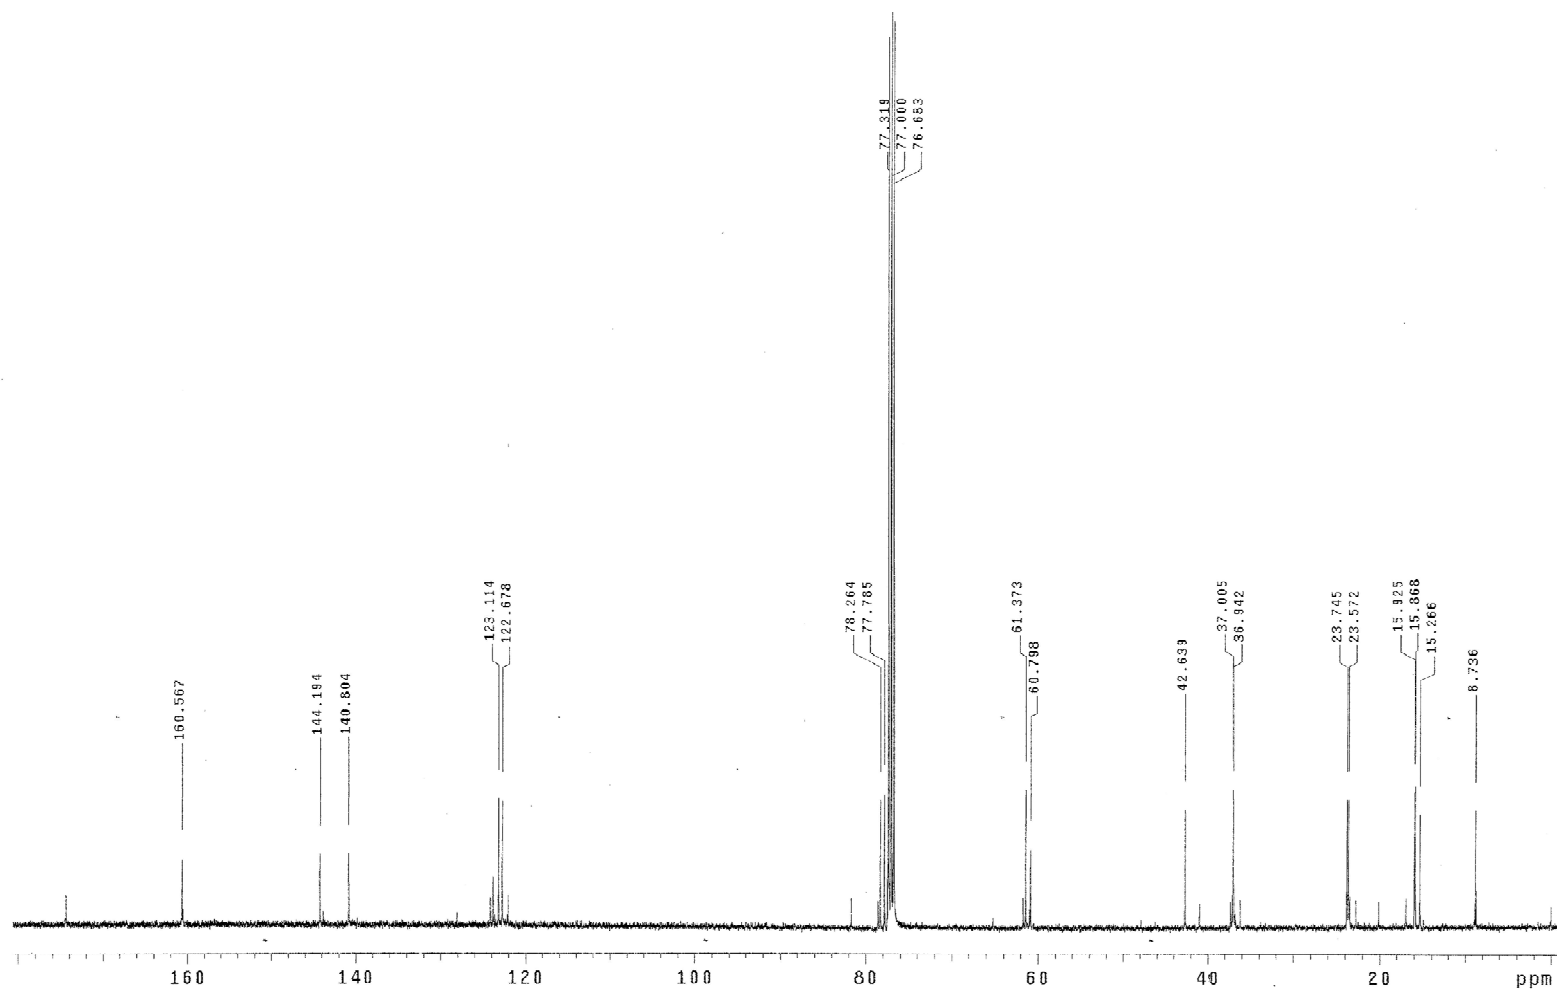

Figure S10.  $^{13}\text{C}$  NMR spectrum of 2 in  $\text{CDCl}_3$

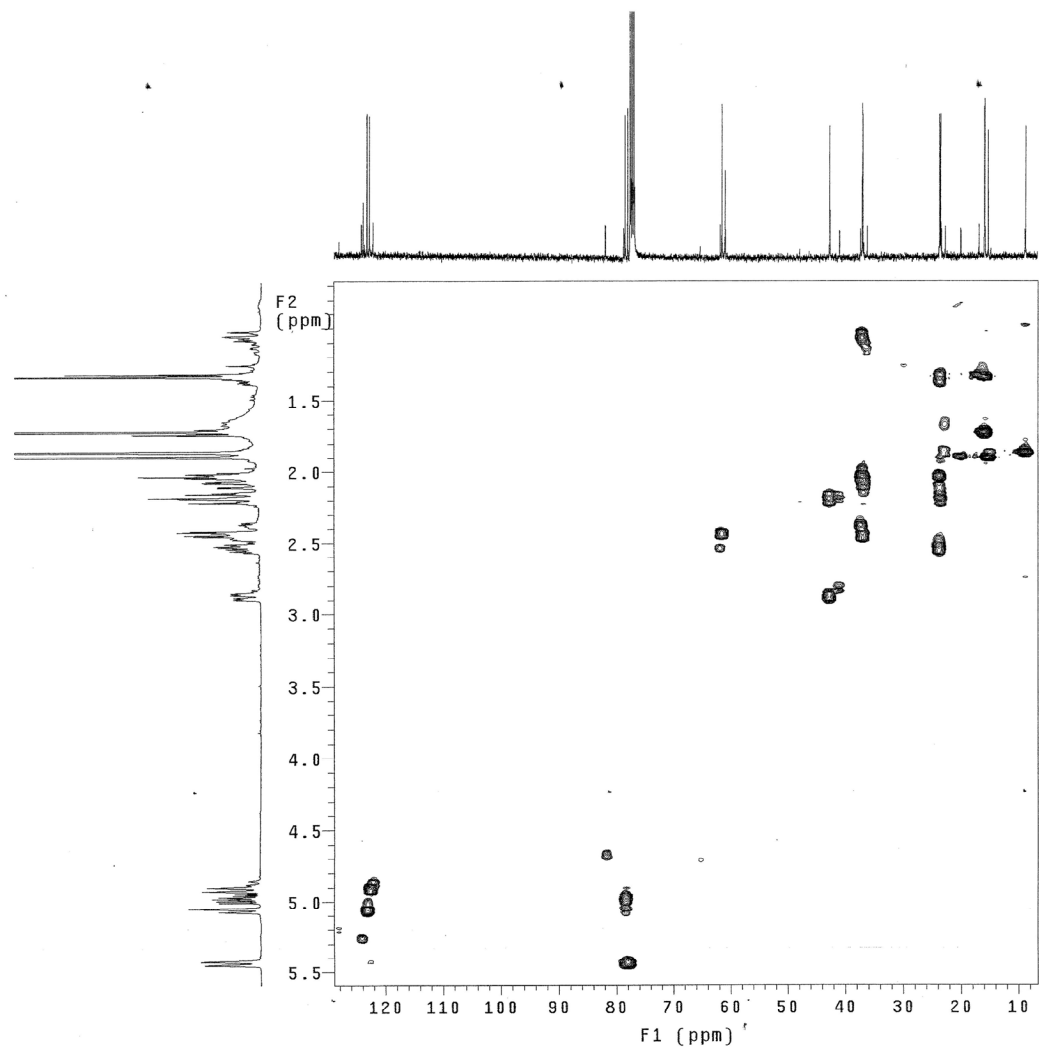

**Figure S11.** HSQC spectrum of **2** in CDCl<sub>3</sub>

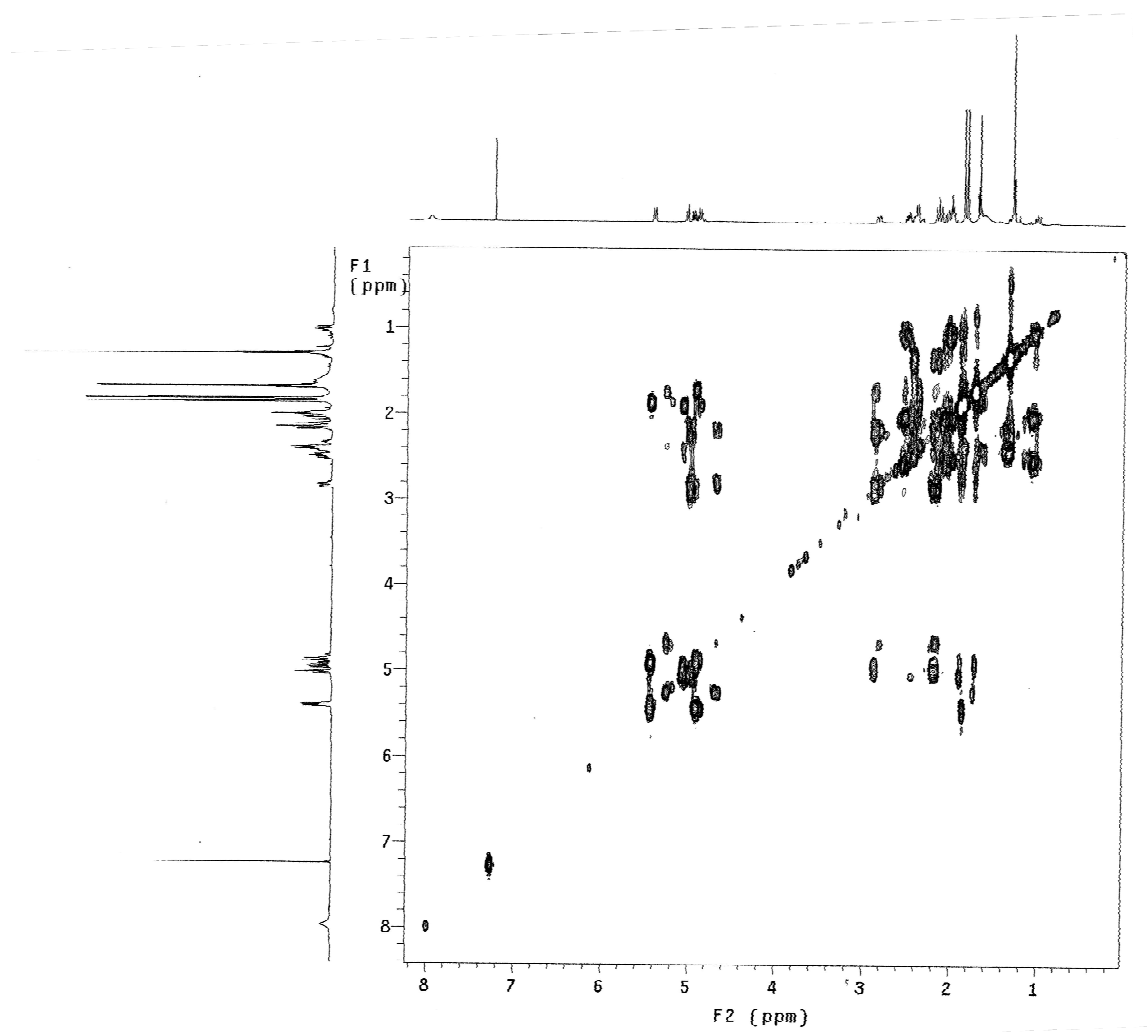

Figure S12.  $^1\text{H}$ - $^1\text{H}$  COSY spectrum of **2** in  $\text{CDCl}_3$

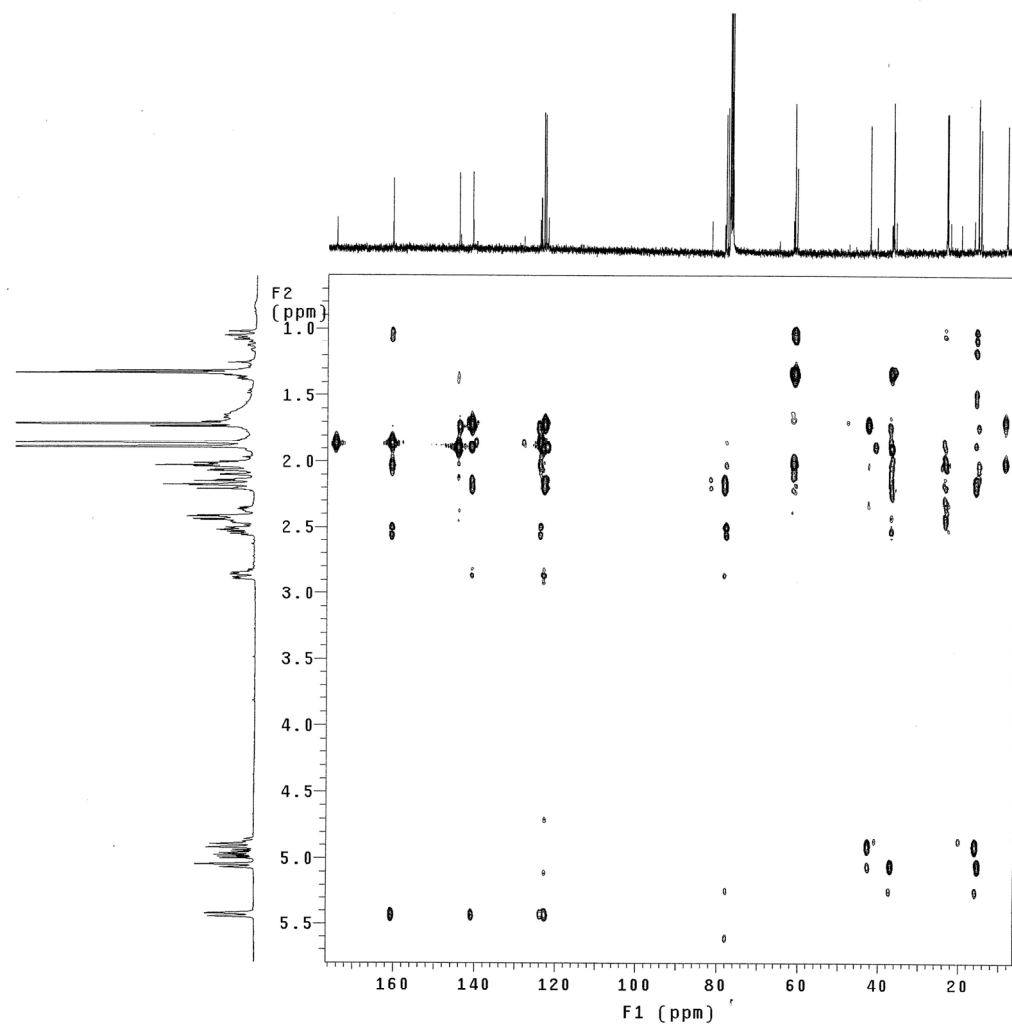

Figure S13. HMBC spectrum of **2** in  $\text{C}_6\text{D}_6$

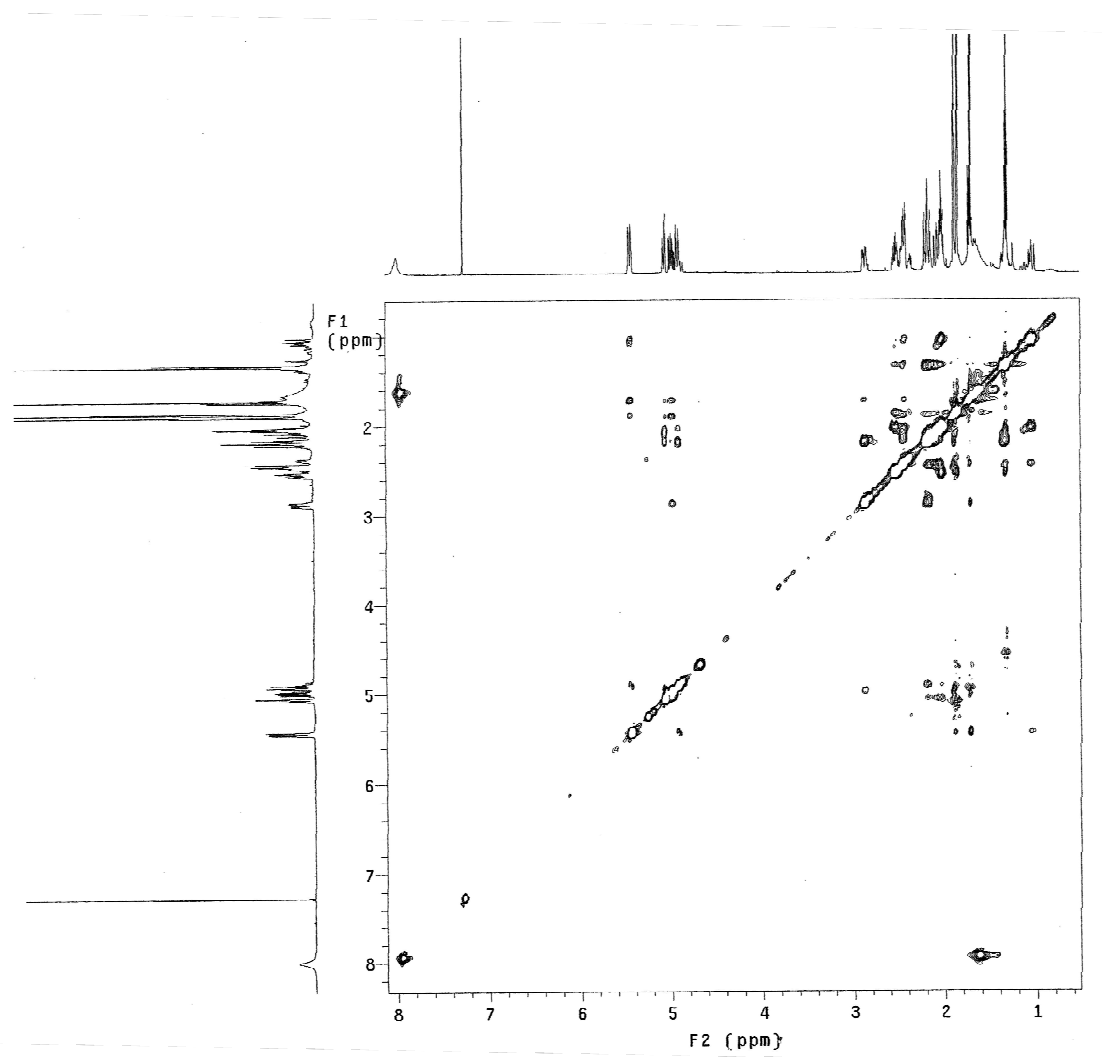

Figure S14. NOESY spectrum of **2** in  $C_6D_6$

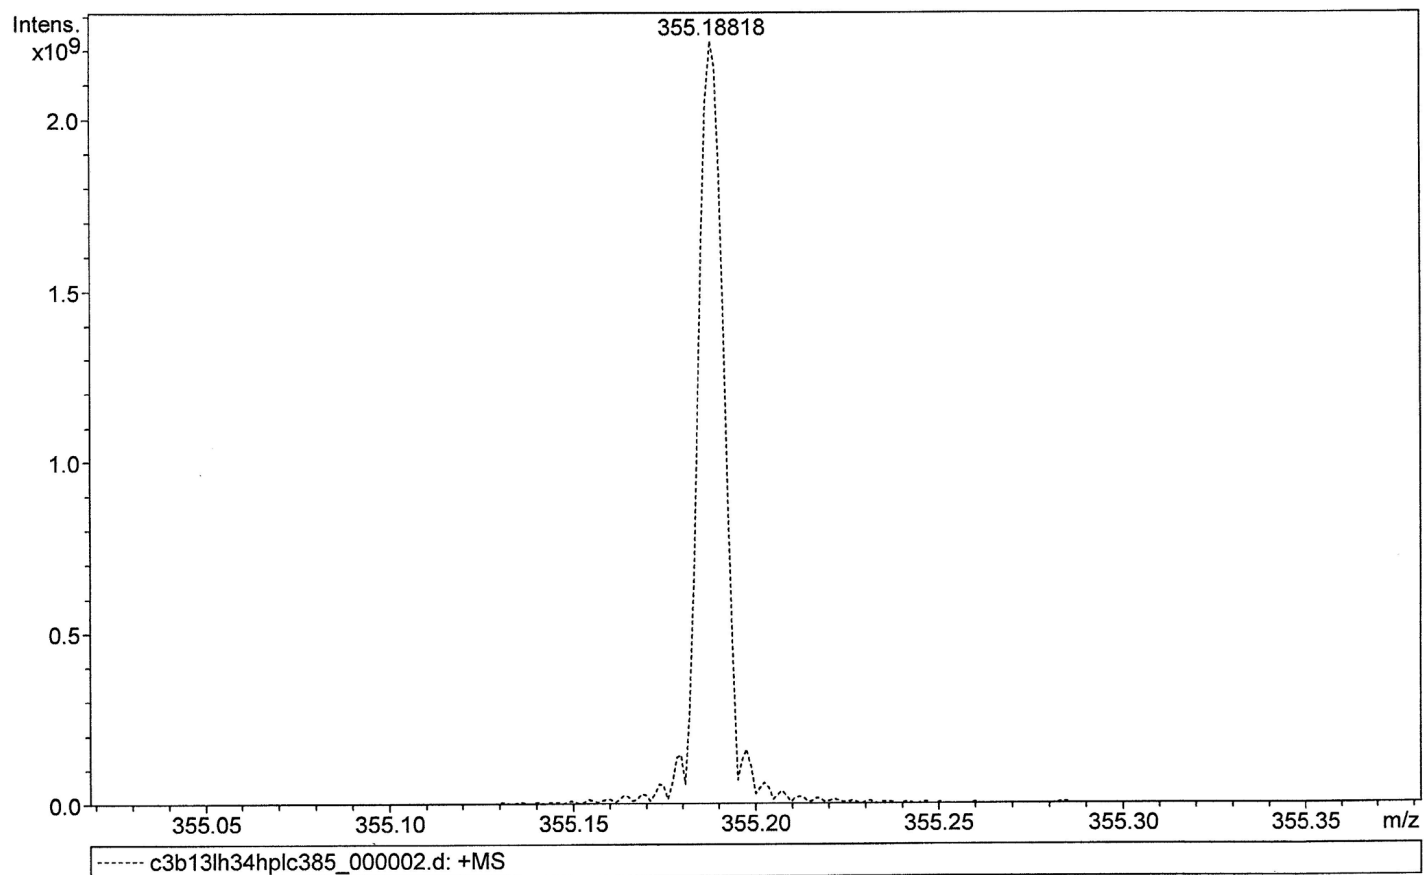

| Meas. m/z | # | Formula                                          | Score  | m/z       | err [mDa] | err [ppm] | mSigma | rdb | e <sup>-</sup> Conf | N-Rule |
|-----------|---|--------------------------------------------------|--------|-----------|-----------|-----------|--------|-----|---------------------|--------|
| 355.18818 | 1 | C <sub>20</sub> H <sub>28</sub> NaO <sub>4</sub> | 100.00 | 355.18798 | -0.20     | -0.57     | 6.3    | 6.5 | even                | ok     |

**Figure S15.** HRESIMS spectrum of **3**

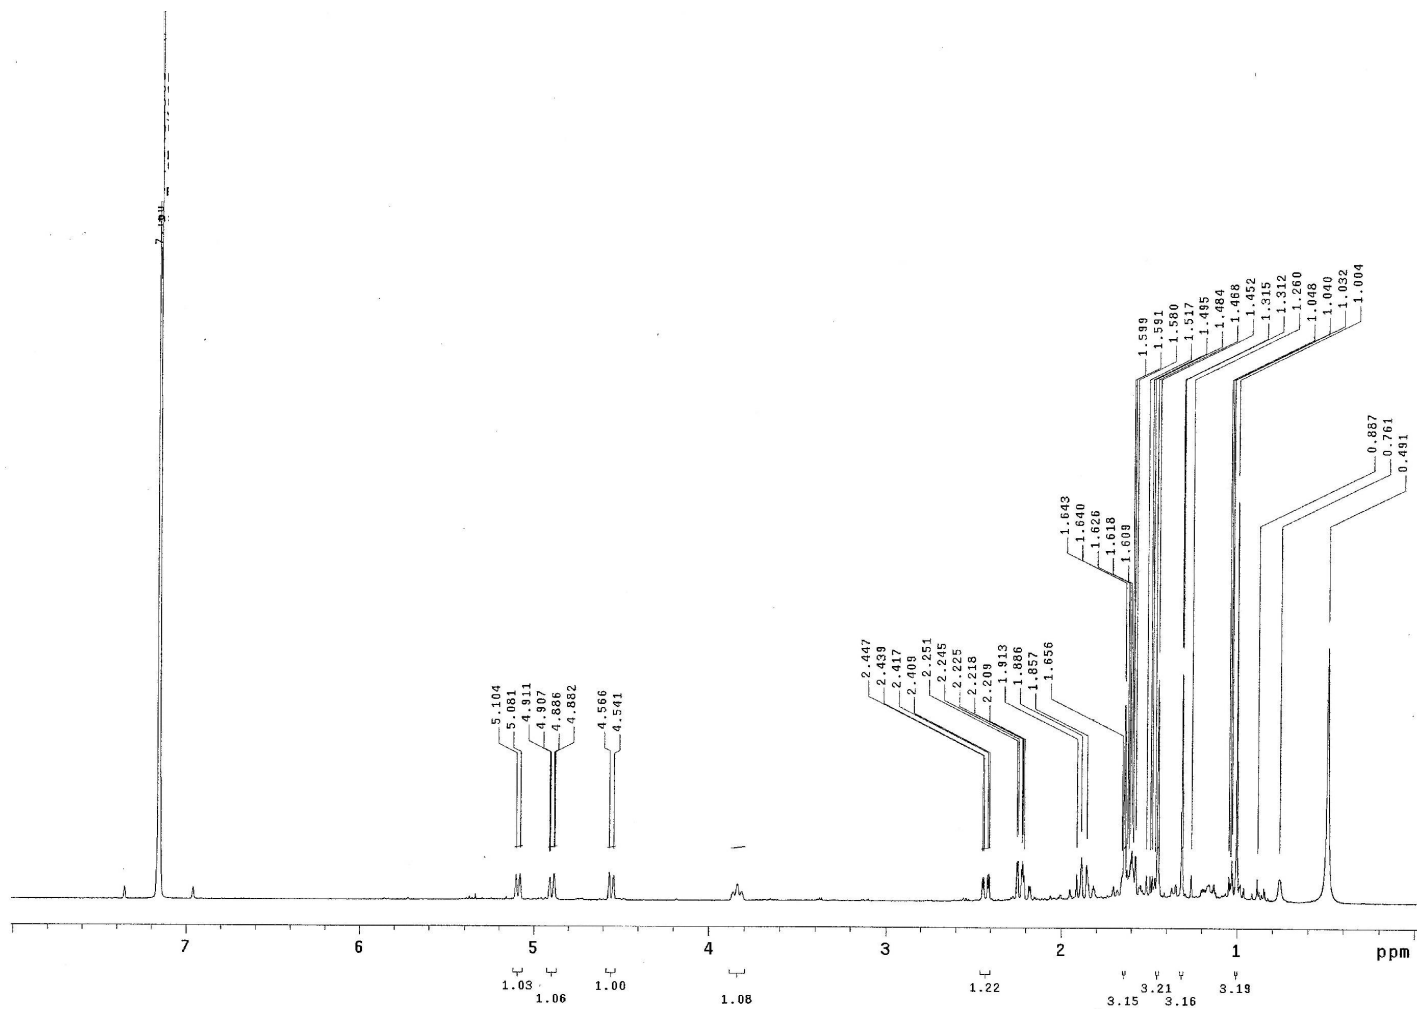

Figure S16.  $^1\text{H}$  NMR spectrum of **3** in  $\text{C}_6\text{D}_6$

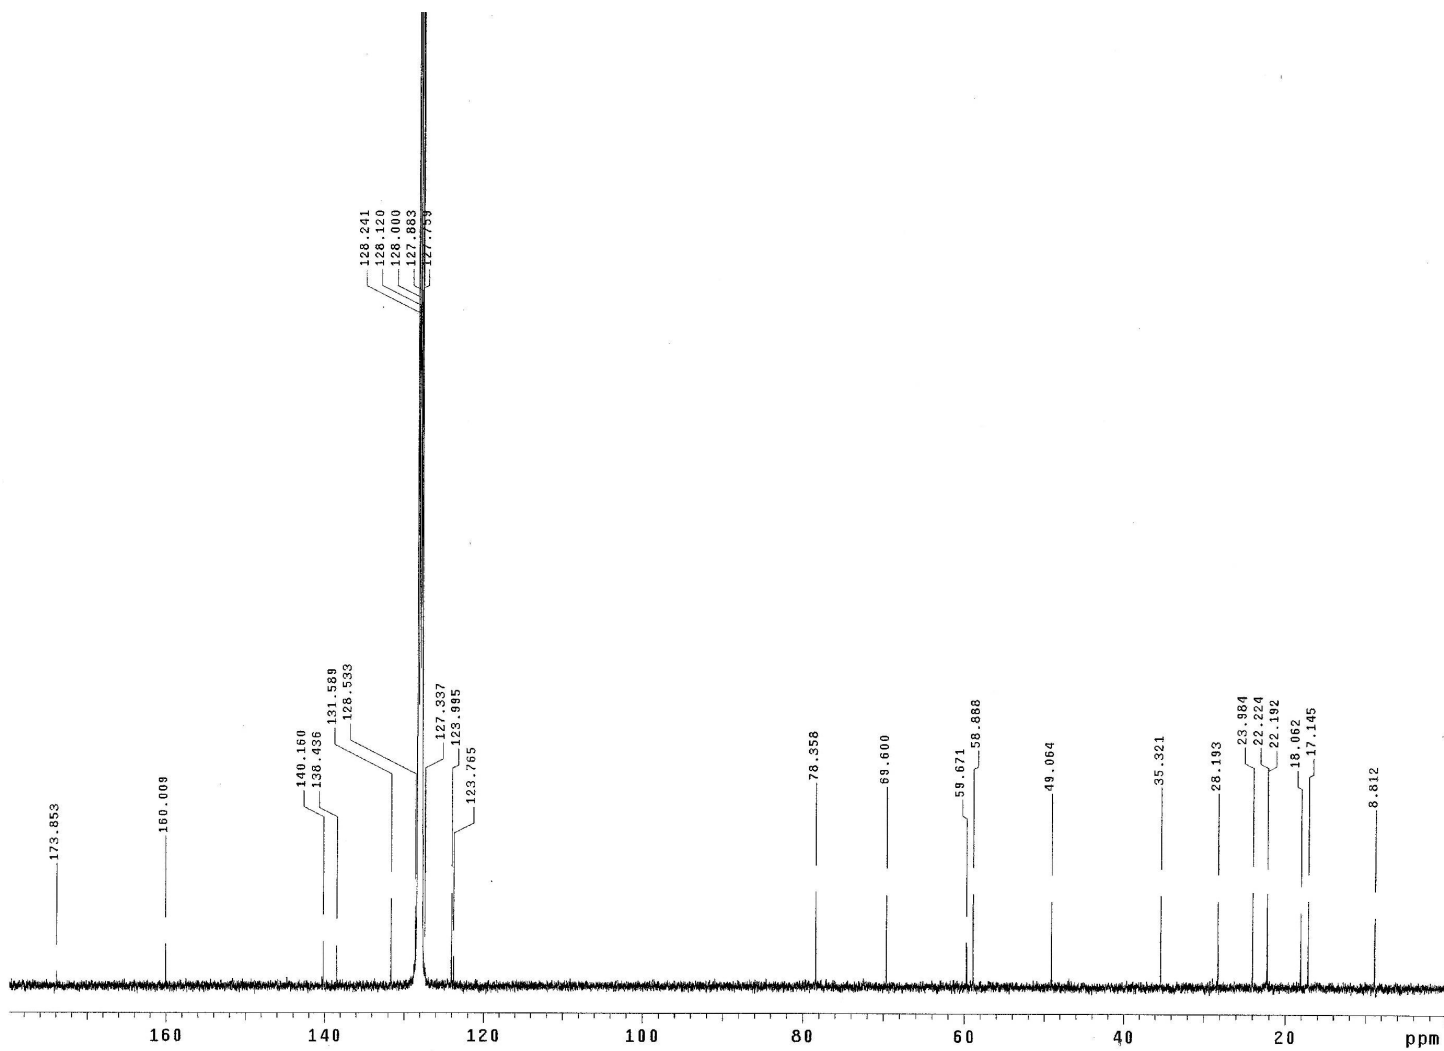

Figure S17.  $^{13}\text{C}$  NMR spectrum of **3** in  $\text{C}_6\text{D}_6$



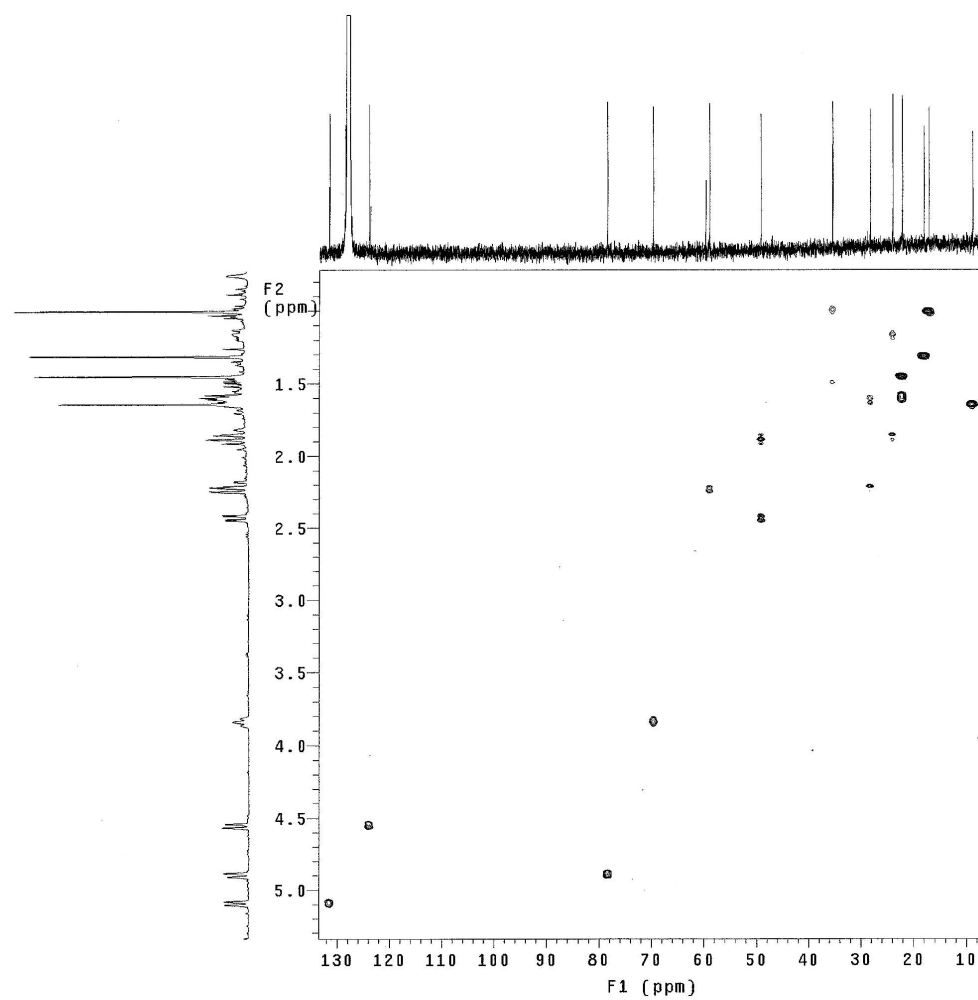

**Figure S18.** HSQC spectrum of **3** in  $\text{C}_6\text{D}_6$

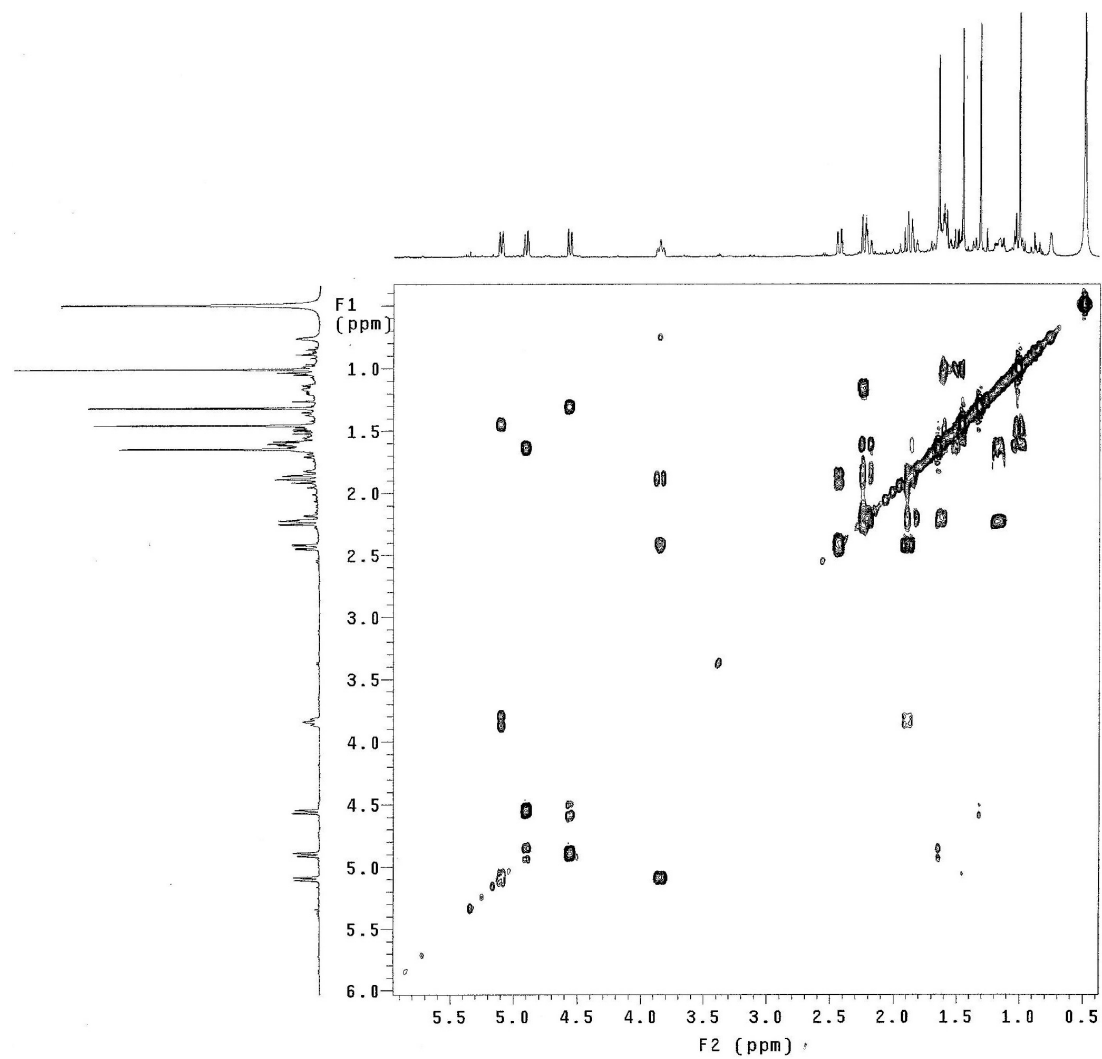

Figure S19.  $^1\text{H}$ - $^1\text{H}$  COSY spectrum of **3** in  $\text{C}_6\text{D}_6$

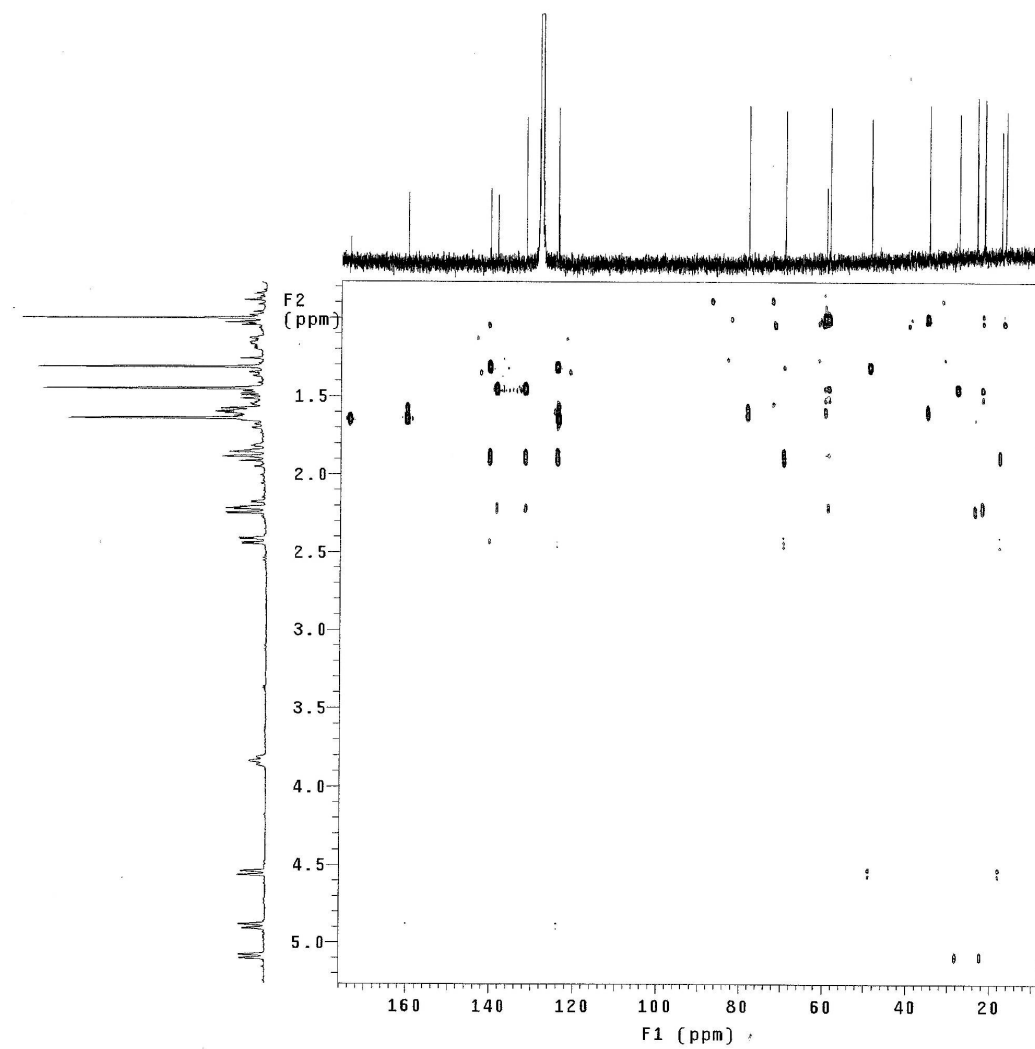

Figure S20. HMBC spectrum of **3** in C<sub>6</sub>D<sub>6</sub>

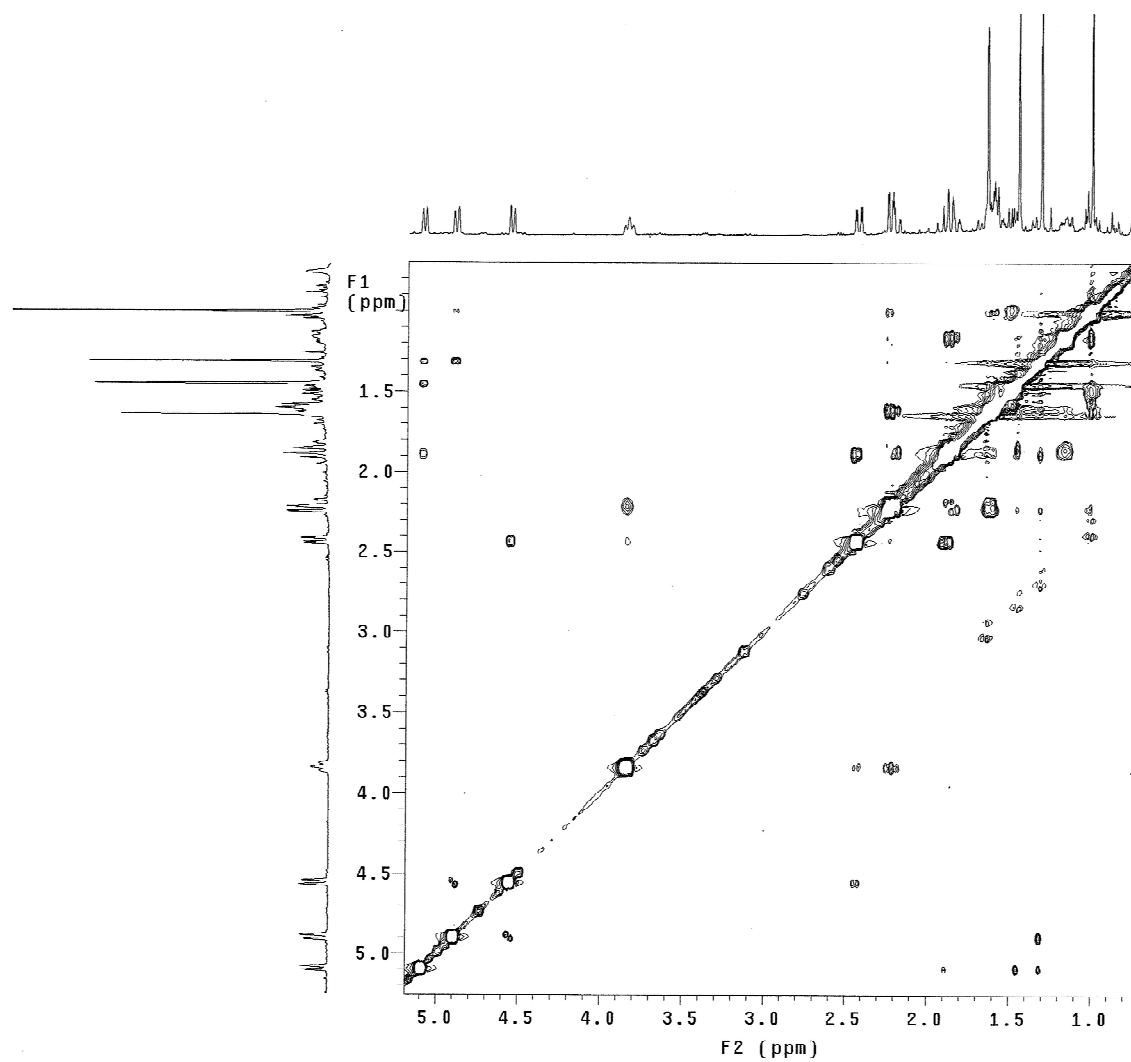

**Figure S21.** NOESY spectrum of **3** in C<sub>6</sub>D<sub>6</sub>

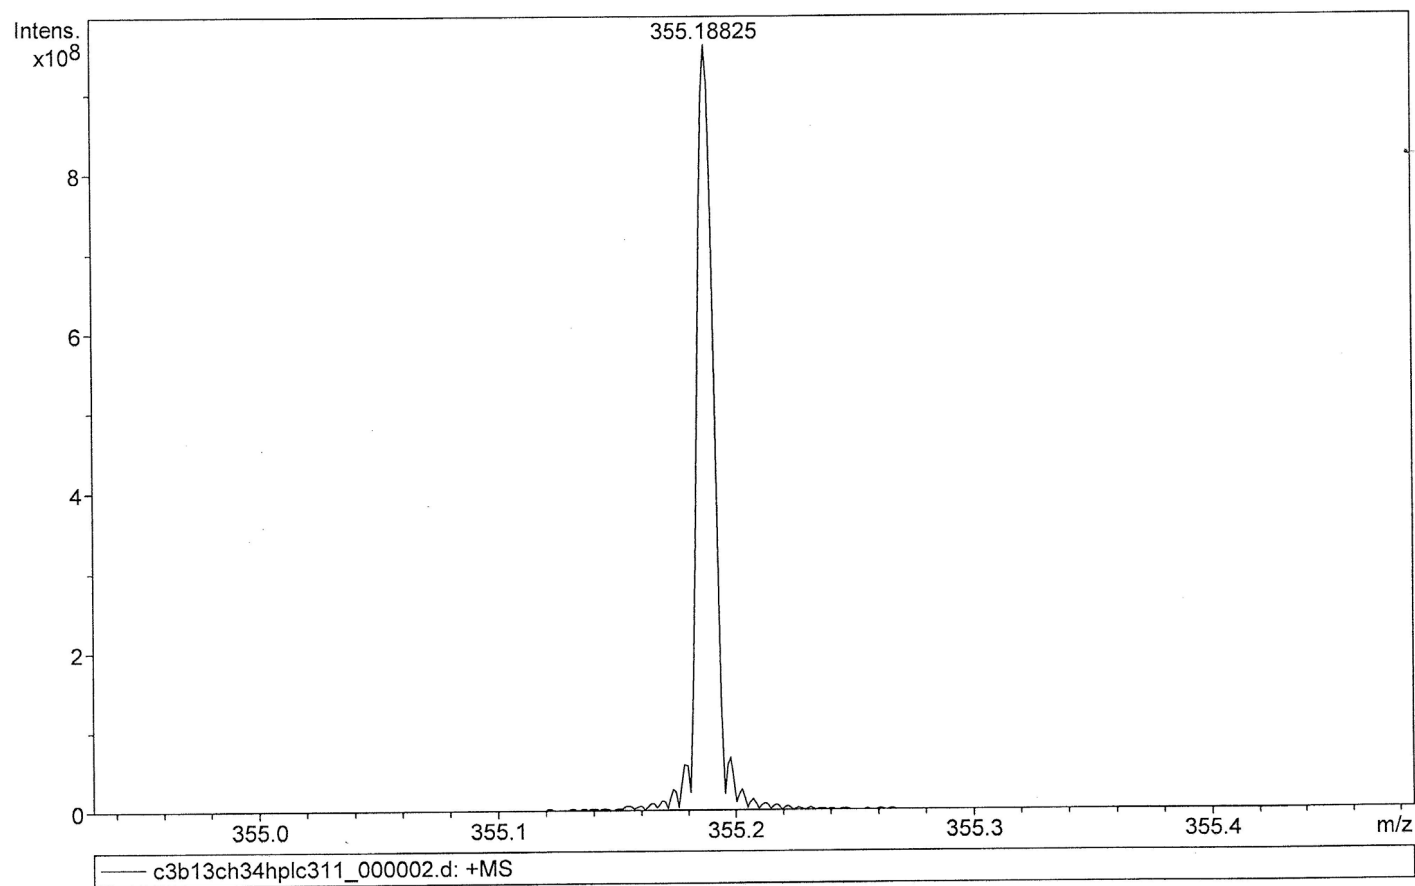

| Meas. m/z | # | Formula                                          | Score  | m/z       | err [mDa] | err [ppm] | mSigma | rdb | e <sup>-</sup> | Conf | N-Rule |
|-----------|---|--------------------------------------------------|--------|-----------|-----------|-----------|--------|-----|----------------|------|--------|
| 355.18825 | 1 | C <sub>20</sub> H <sub>28</sub> NaO <sub>4</sub> | 100.00 | 355.18798 | -0.27     | -0.75     | 13.1   | 6.5 | even           |      | ok     |

**Figure S22.** HREIMS spectrum of **4**

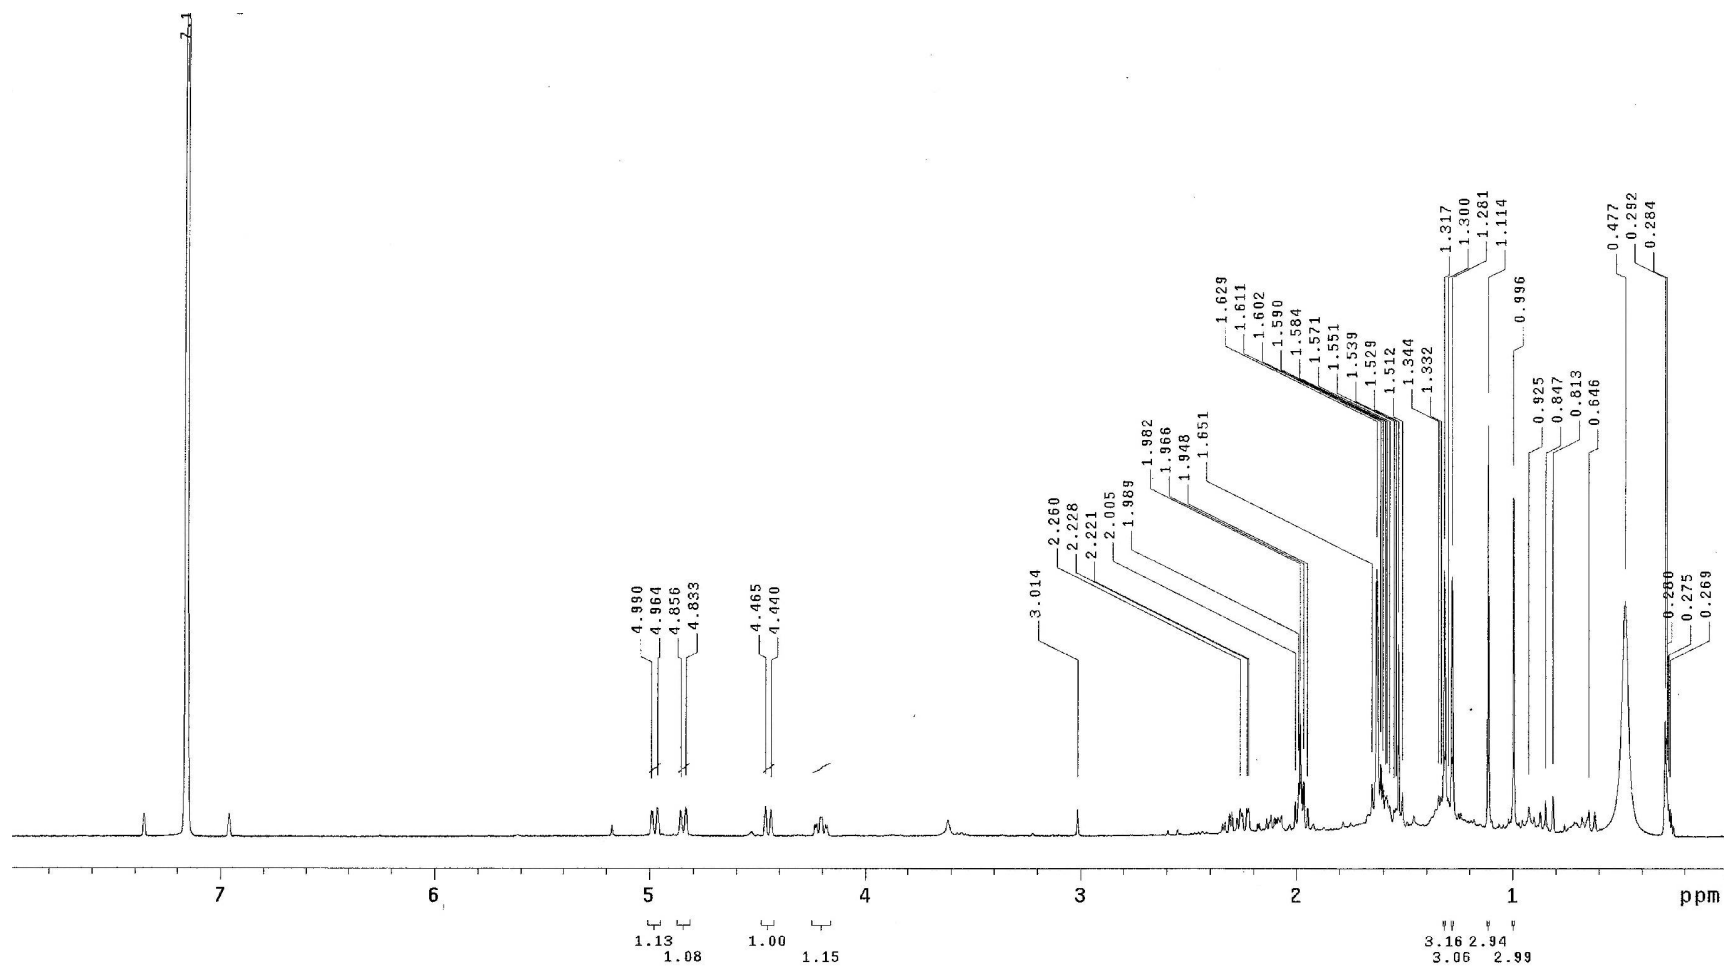

Figure S23.  $^1\text{H}$  NMR spectrum of **4** in  $\text{C}_6\text{D}_6$

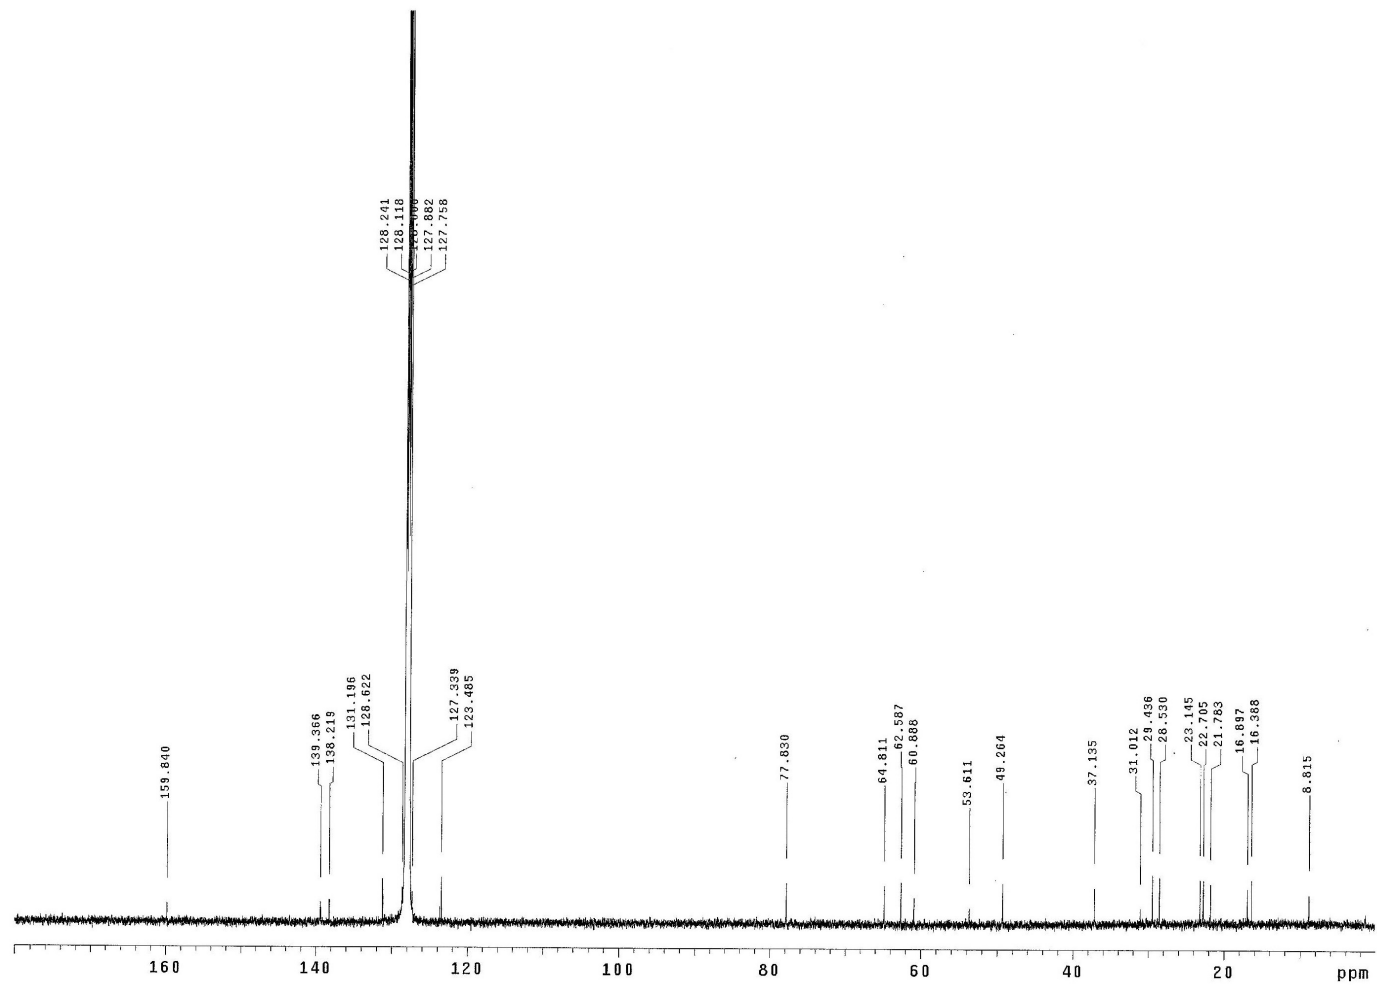

Figure S24.  $^{13}\text{C}$  NMR spectrum of 4 in  $\text{C}_6\text{D}_6$

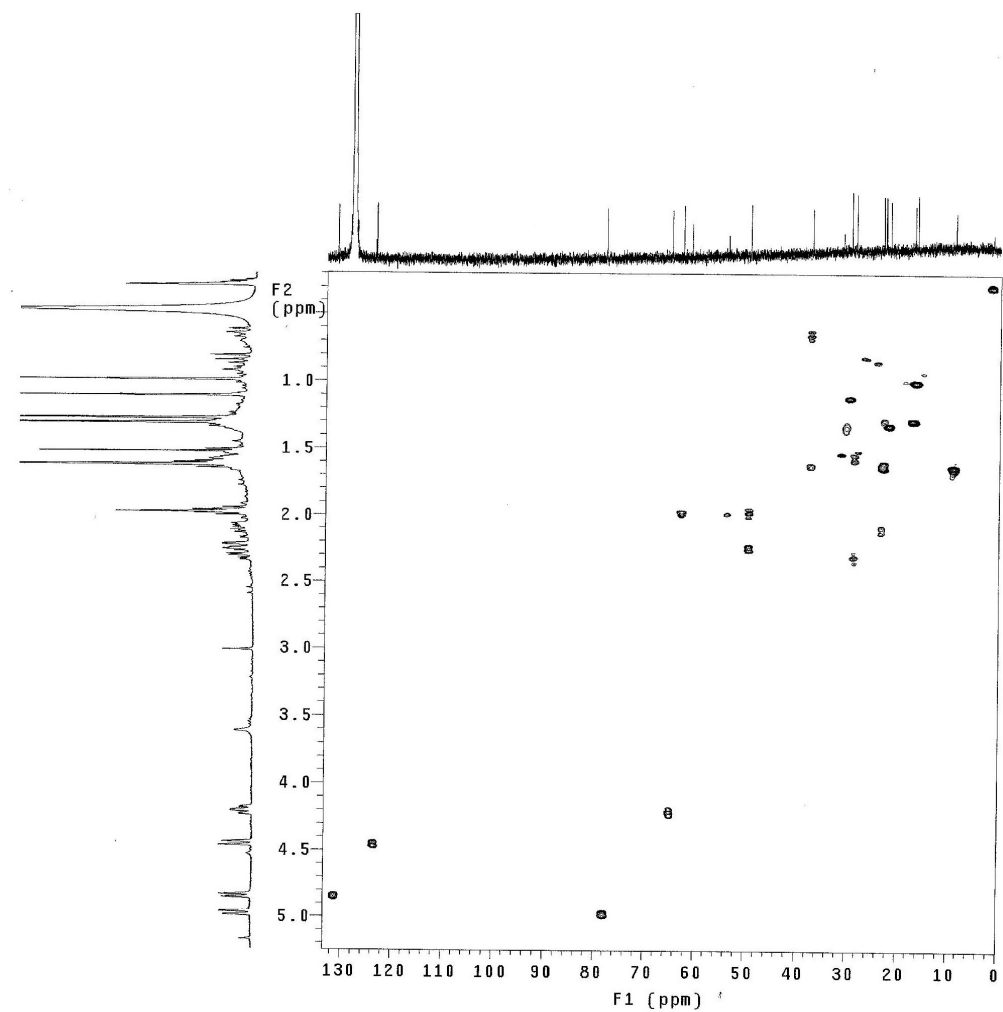

Figure S25. HSQC spectrum of 4 in C<sub>6</sub>D<sub>6</sub>



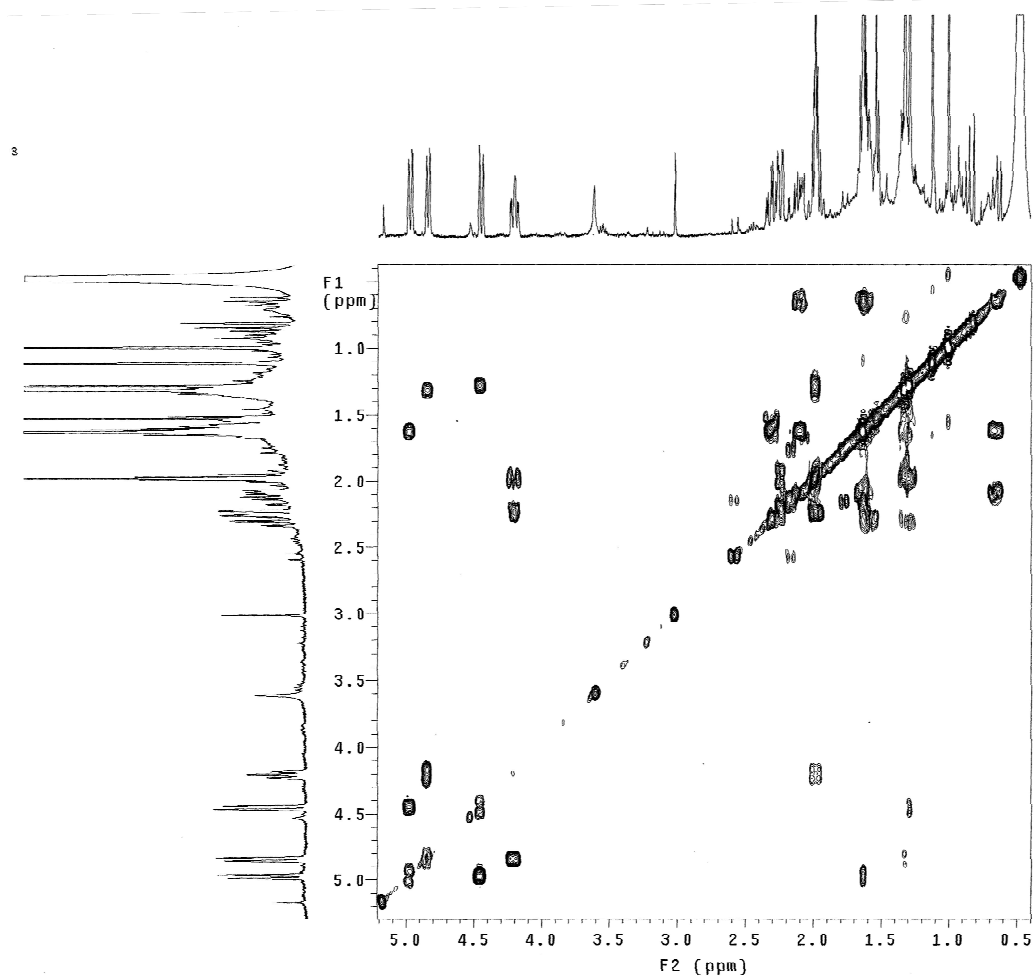

Figure S26.  $^1\text{H}$ - $^1\text{H}$  COSY spectrum of **4** in  $\text{C}_6\text{D}_6$

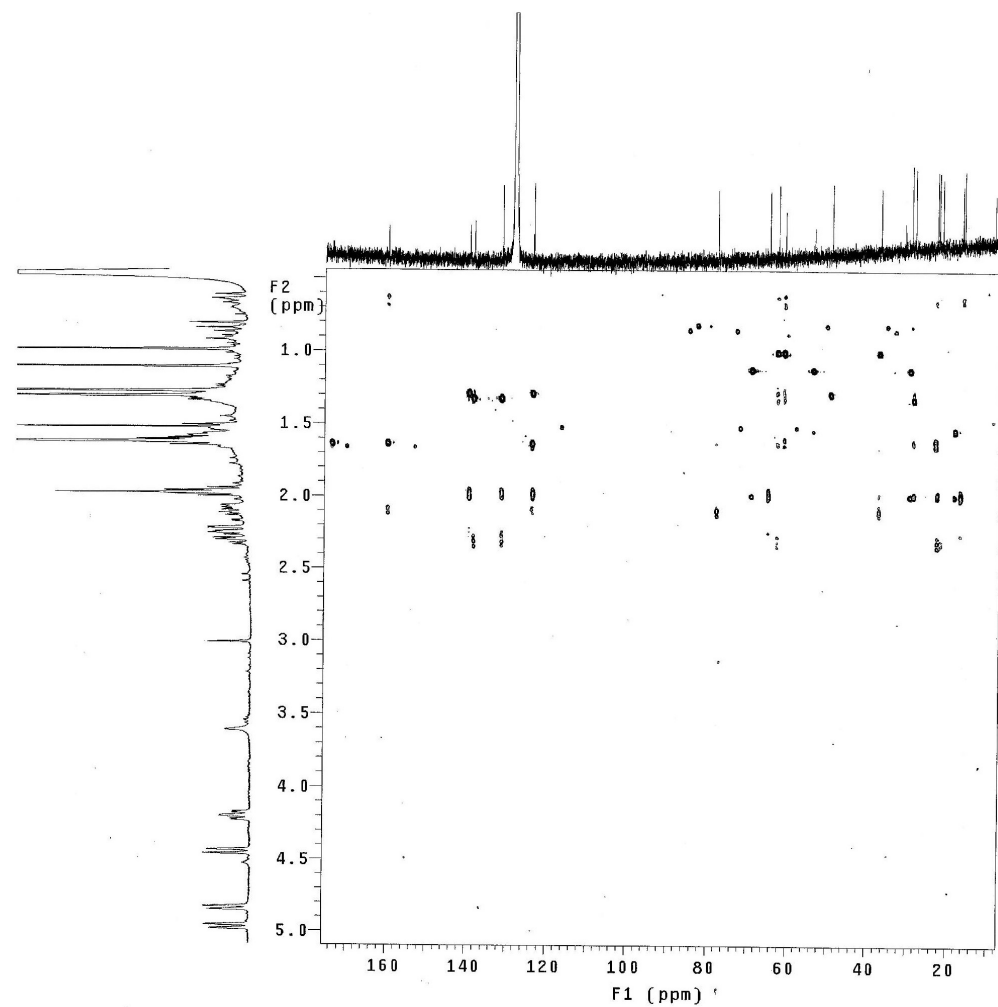

Figure S27. HMBC spectrum of **4** in C<sub>6</sub>D<sub>6</sub>

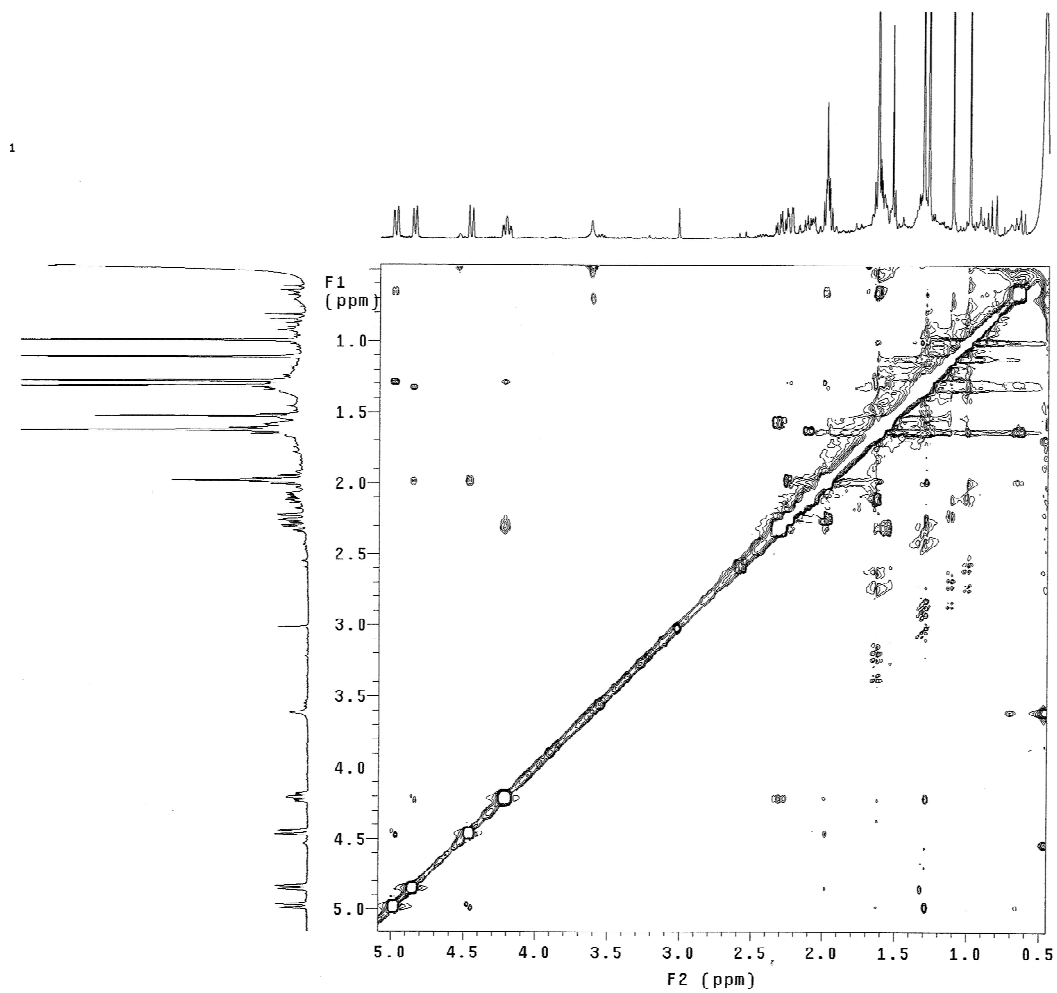

**Figure S28.** NOESY spectrum of **4** in C<sub>6</sub>D<sub>6</sub>

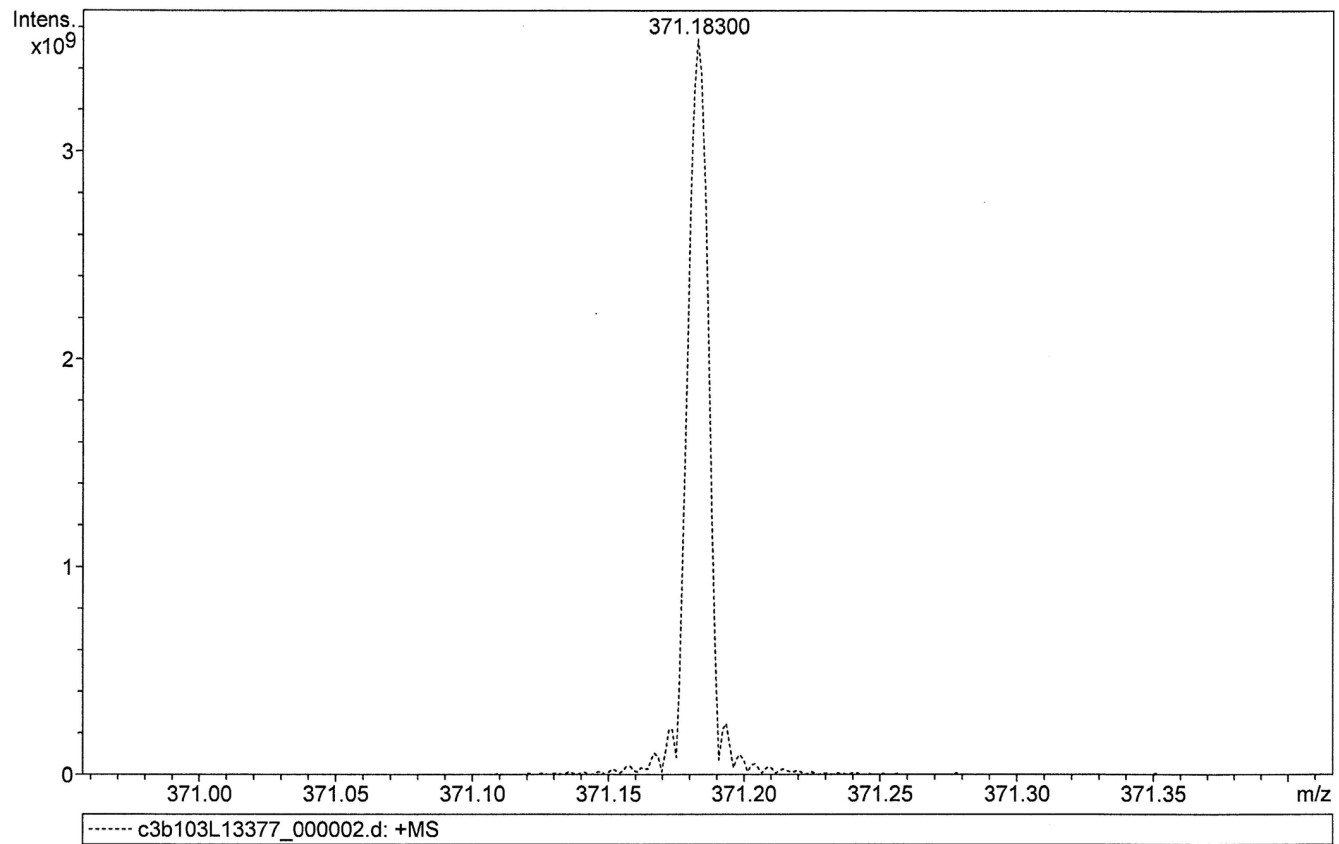

| Meas. m/z | # | Formula                                          | Score  | m/z       | err [mDa] | err [ppm] | mSigma | rdb | e <sup>-</sup> Conf | N-Rule |
|-----------|---|--------------------------------------------------|--------|-----------|-----------|-----------|--------|-----|---------------------|--------|
| 371.18300 | 1 | C <sub>20</sub> H <sub>28</sub> NaO <sub>5</sub> | 100.00 | 371.18290 | -0.11     | -0.29     | 6.6    | 6.5 | even                | ok     |

**Figure S29.** HREIMS spectrum of **5**

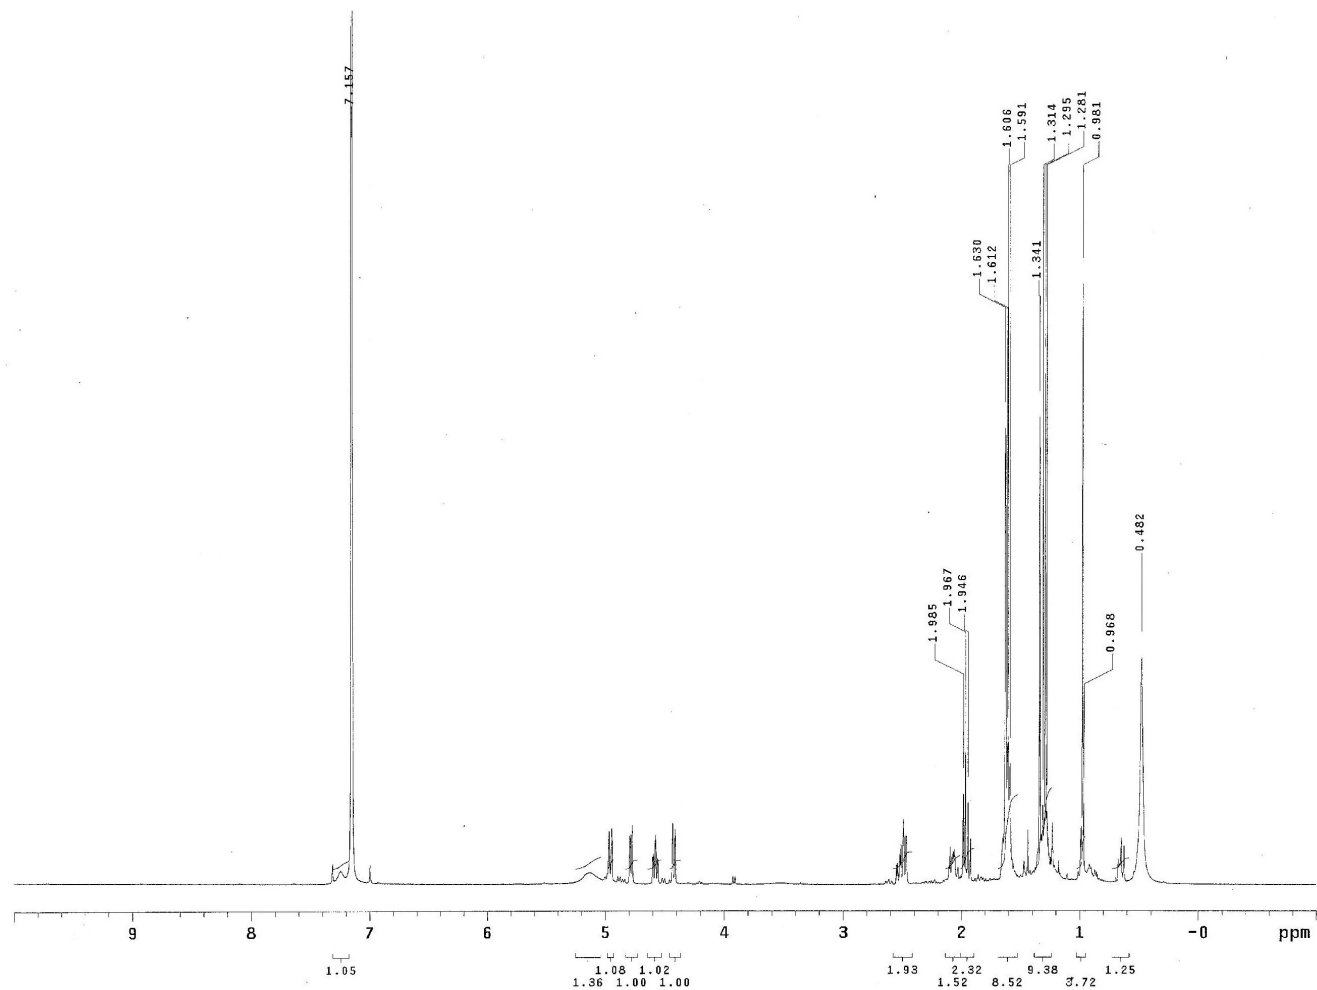

Figure S30.  $^1\text{H}$  NMR spectrum of **5** in  $\text{C}_6\text{D}_6$

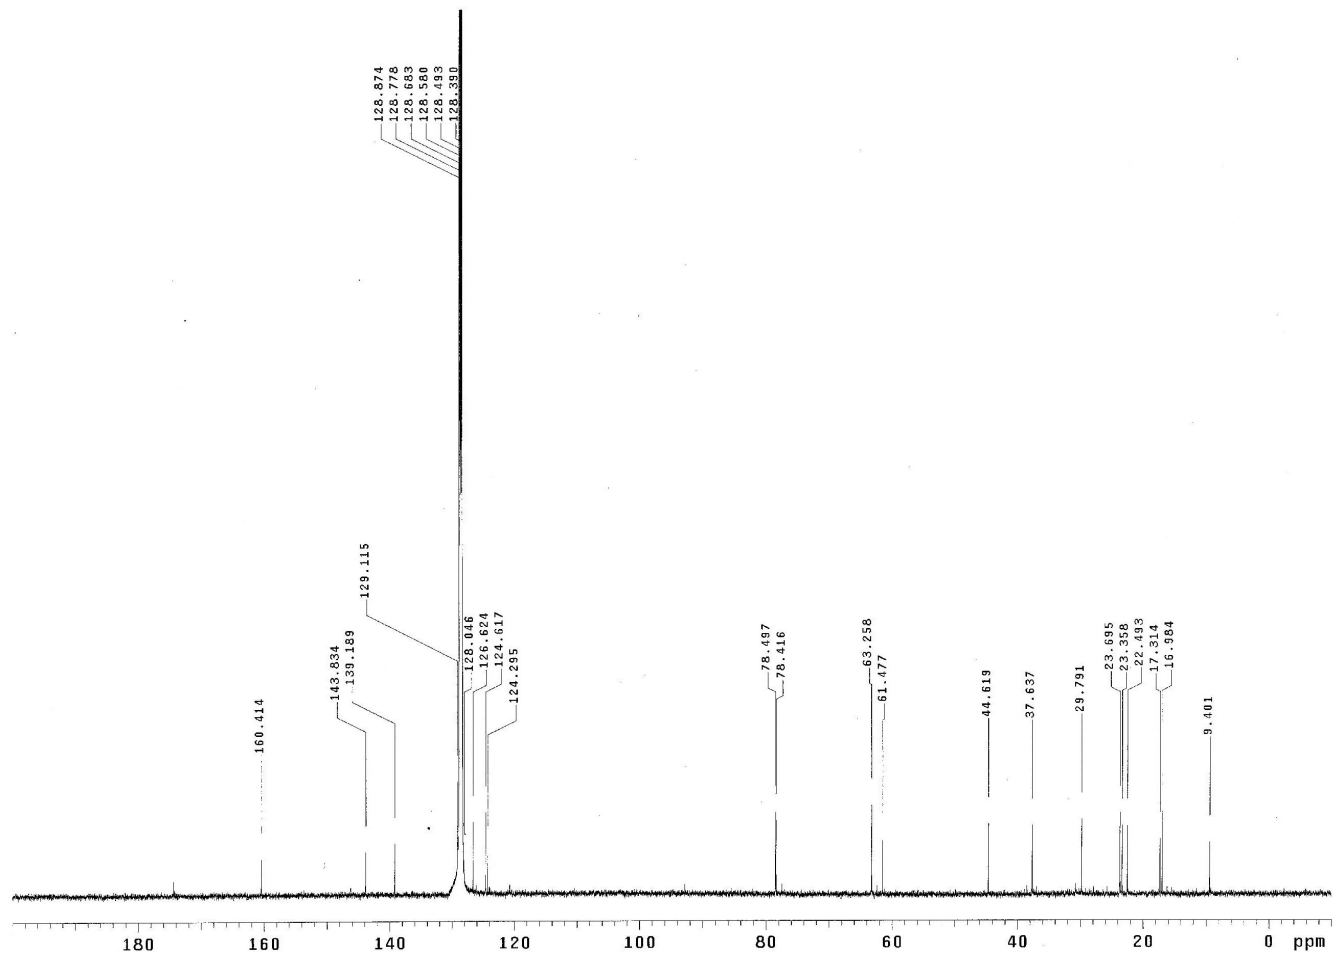

Figure S31.  $^{13}\text{C}$  NMR spectrum of 5 in  $\text{C}_6\text{D}_6$

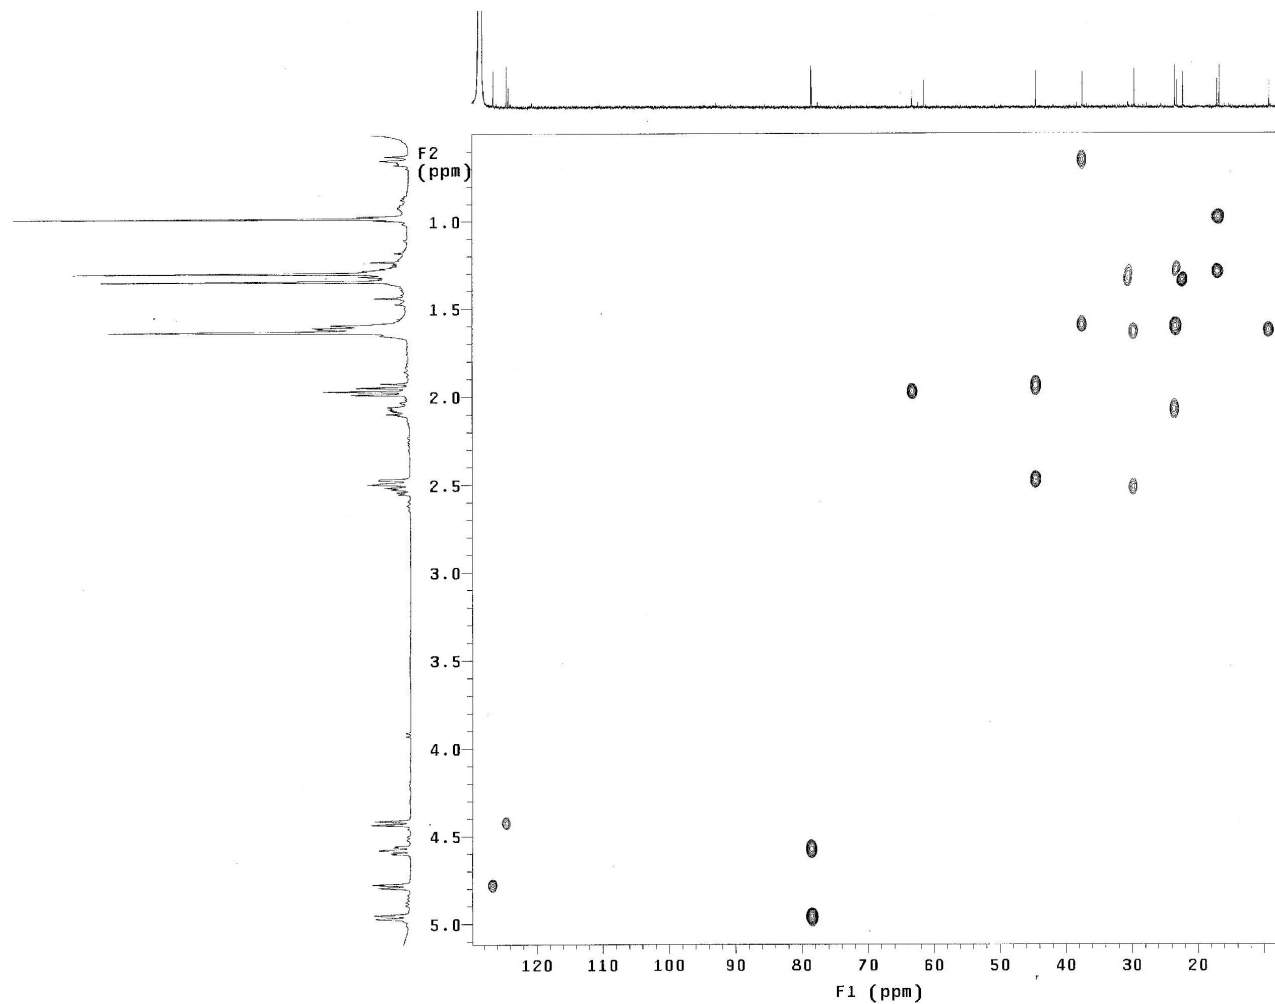

**Figure S32.** HSQC spectrum of **5** in  $C_6D_6$

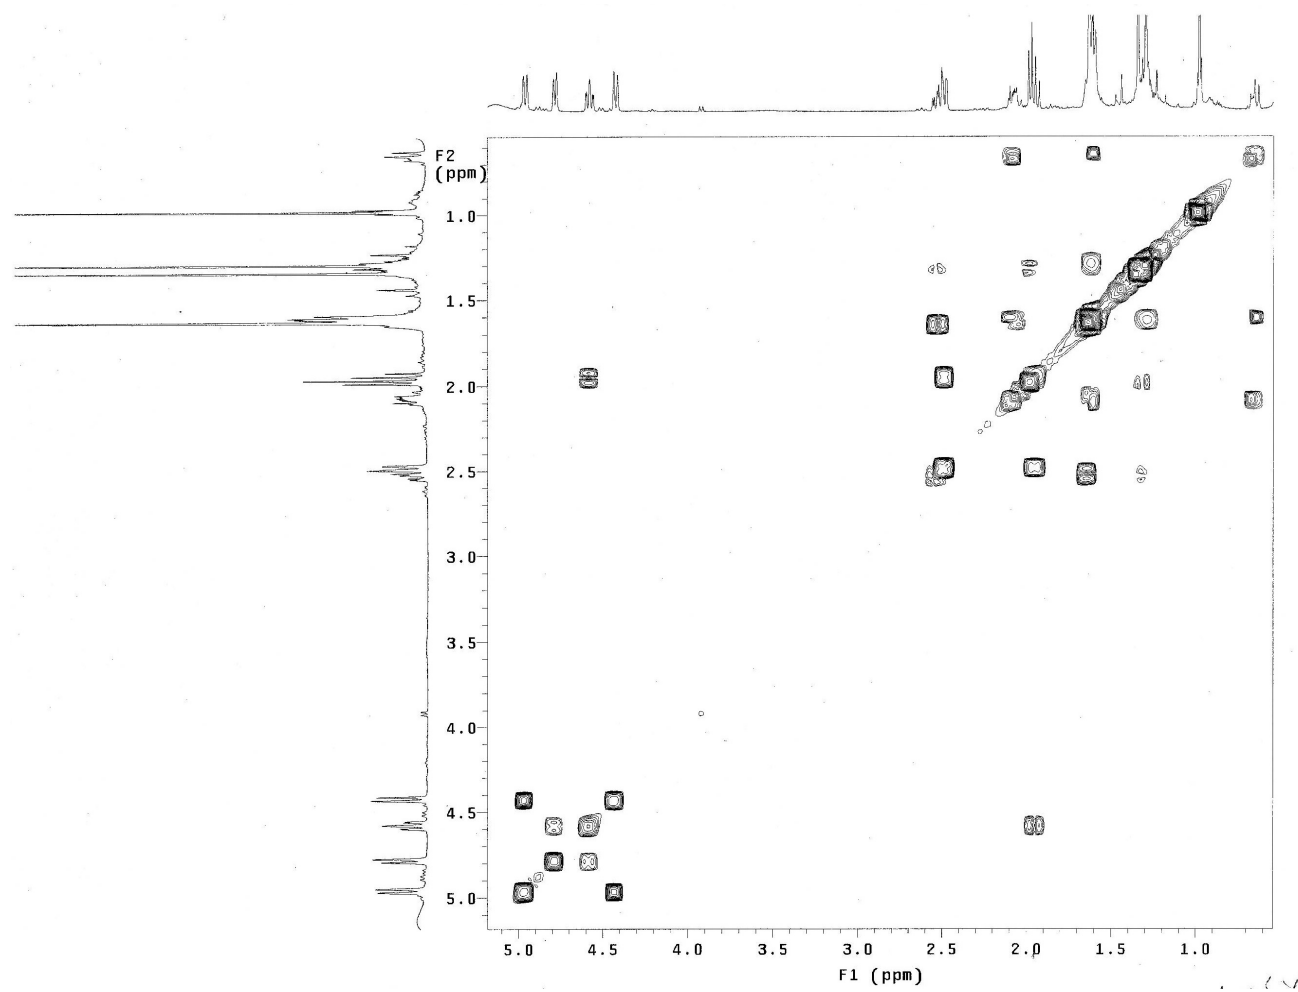

Figure S33.  $^1\text{H}$ - $^1\text{H}$  COSY spectrum of **5** in  $\text{C}_6\text{D}_6$



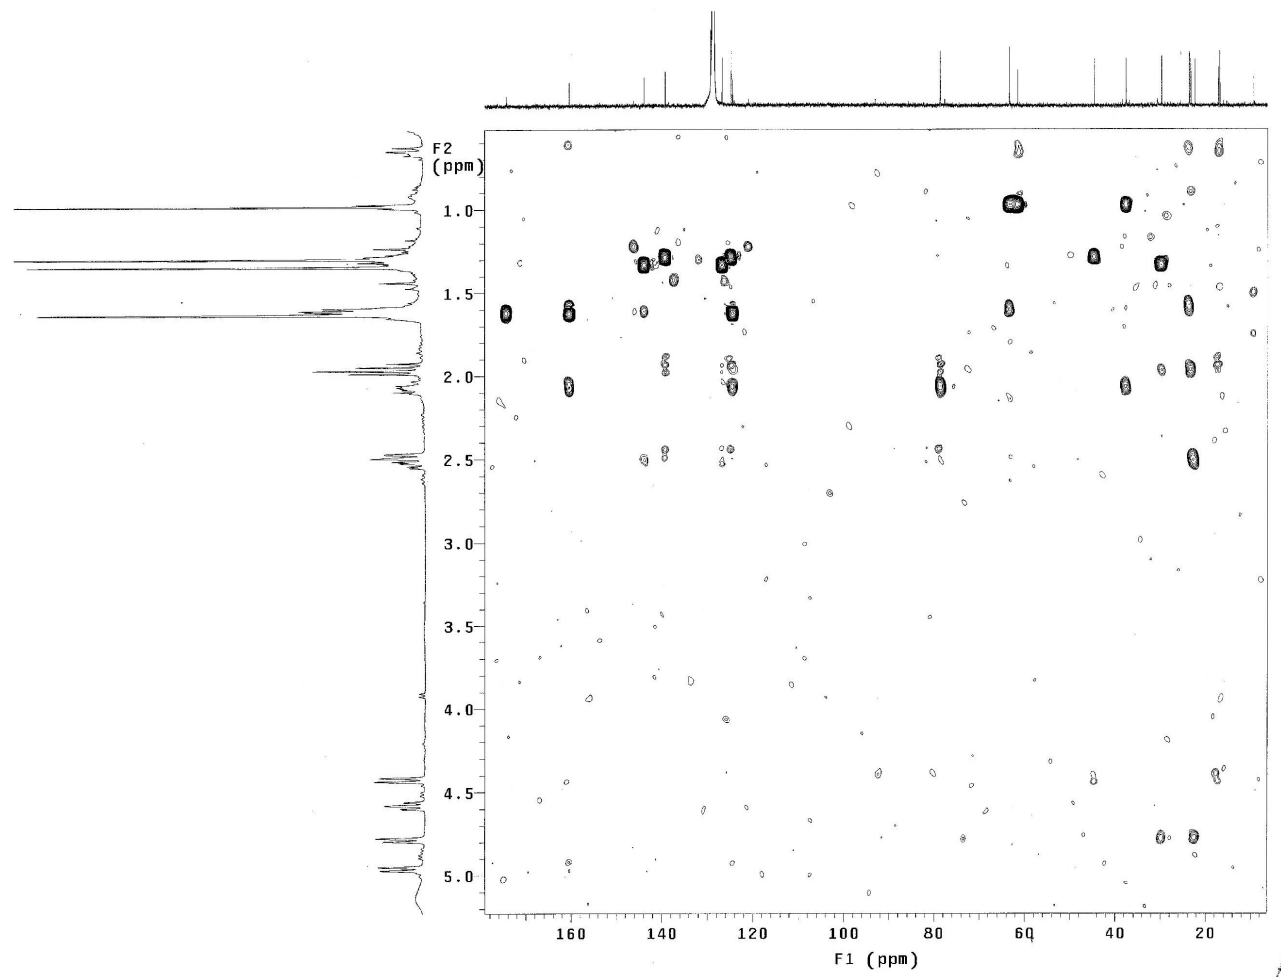

Figure S34. HMBC spectrum of 5 in C<sub>6</sub>D<sub>6</sub>

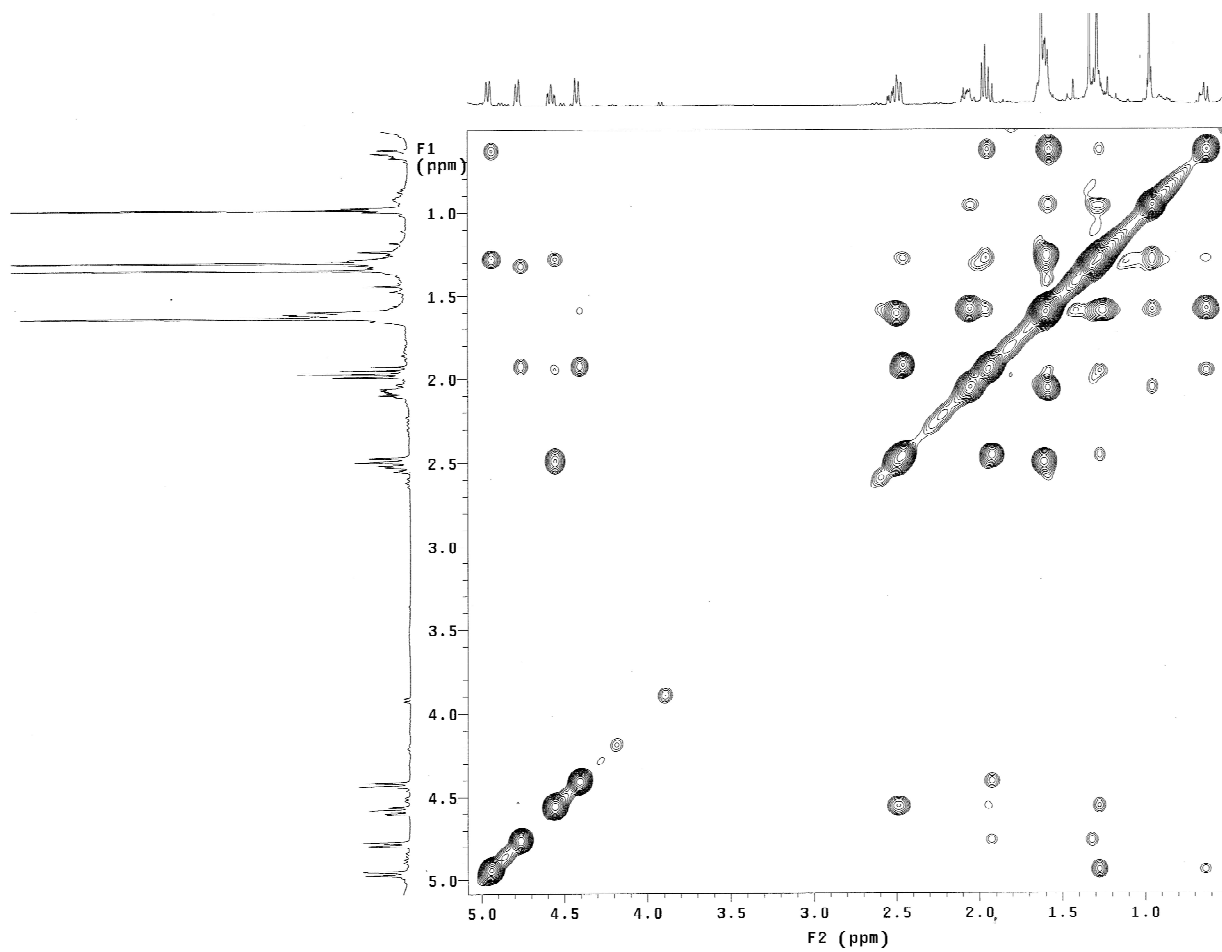

**Figure S35.** NOESY spectrum of **5** in  $C_6D_6$

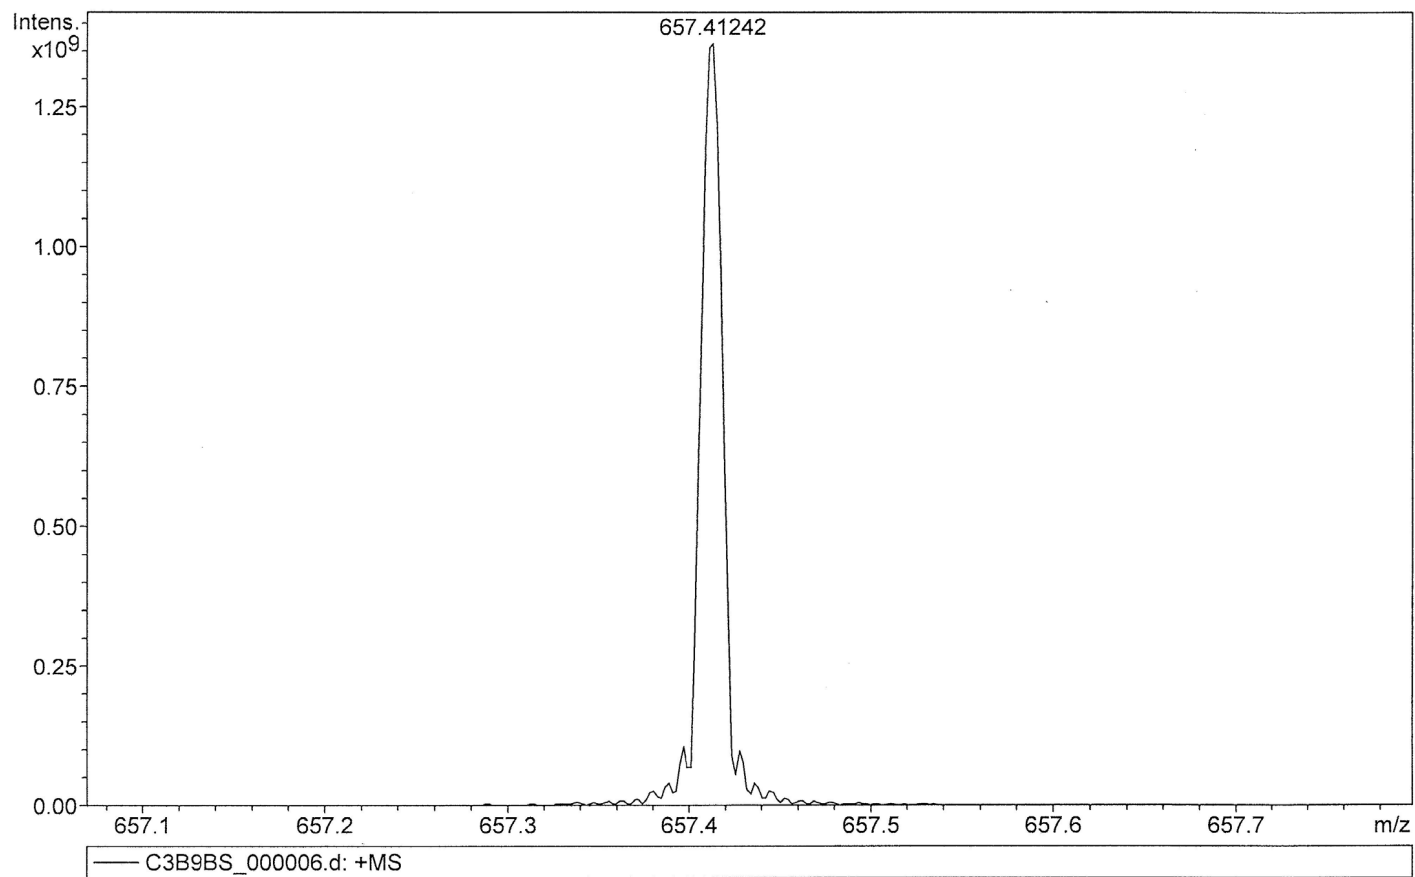

| Meas. m/z | # | Formula                                          | Score  | m/z       | err [mDa] | err [ppm] | mSigma | rdb  | e <sup>-</sup> Conf | N-Rule |
|-----------|---|--------------------------------------------------|--------|-----------|-----------|-----------|--------|------|---------------------|--------|
| 657.41242 | 1 | C <sub>40</sub> H <sub>58</sub> NaO <sub>6</sub> | 100.00 | 657.41256 | 0.14      | 0.22      | 16.2   | 11.5 | even                | ok     |

**Figure S36.** HRESIMS spectrum of **6**

# FT-MS

## Analysis Info

Analysis Name D:\Data\11\C3B9BS\_000006.d  
Method broadband first signal  
Sample Name C3b-9bs  
Comment ESI Positive

11/6/2015 10:45:00 AM

Instrument: FT-MS solariX

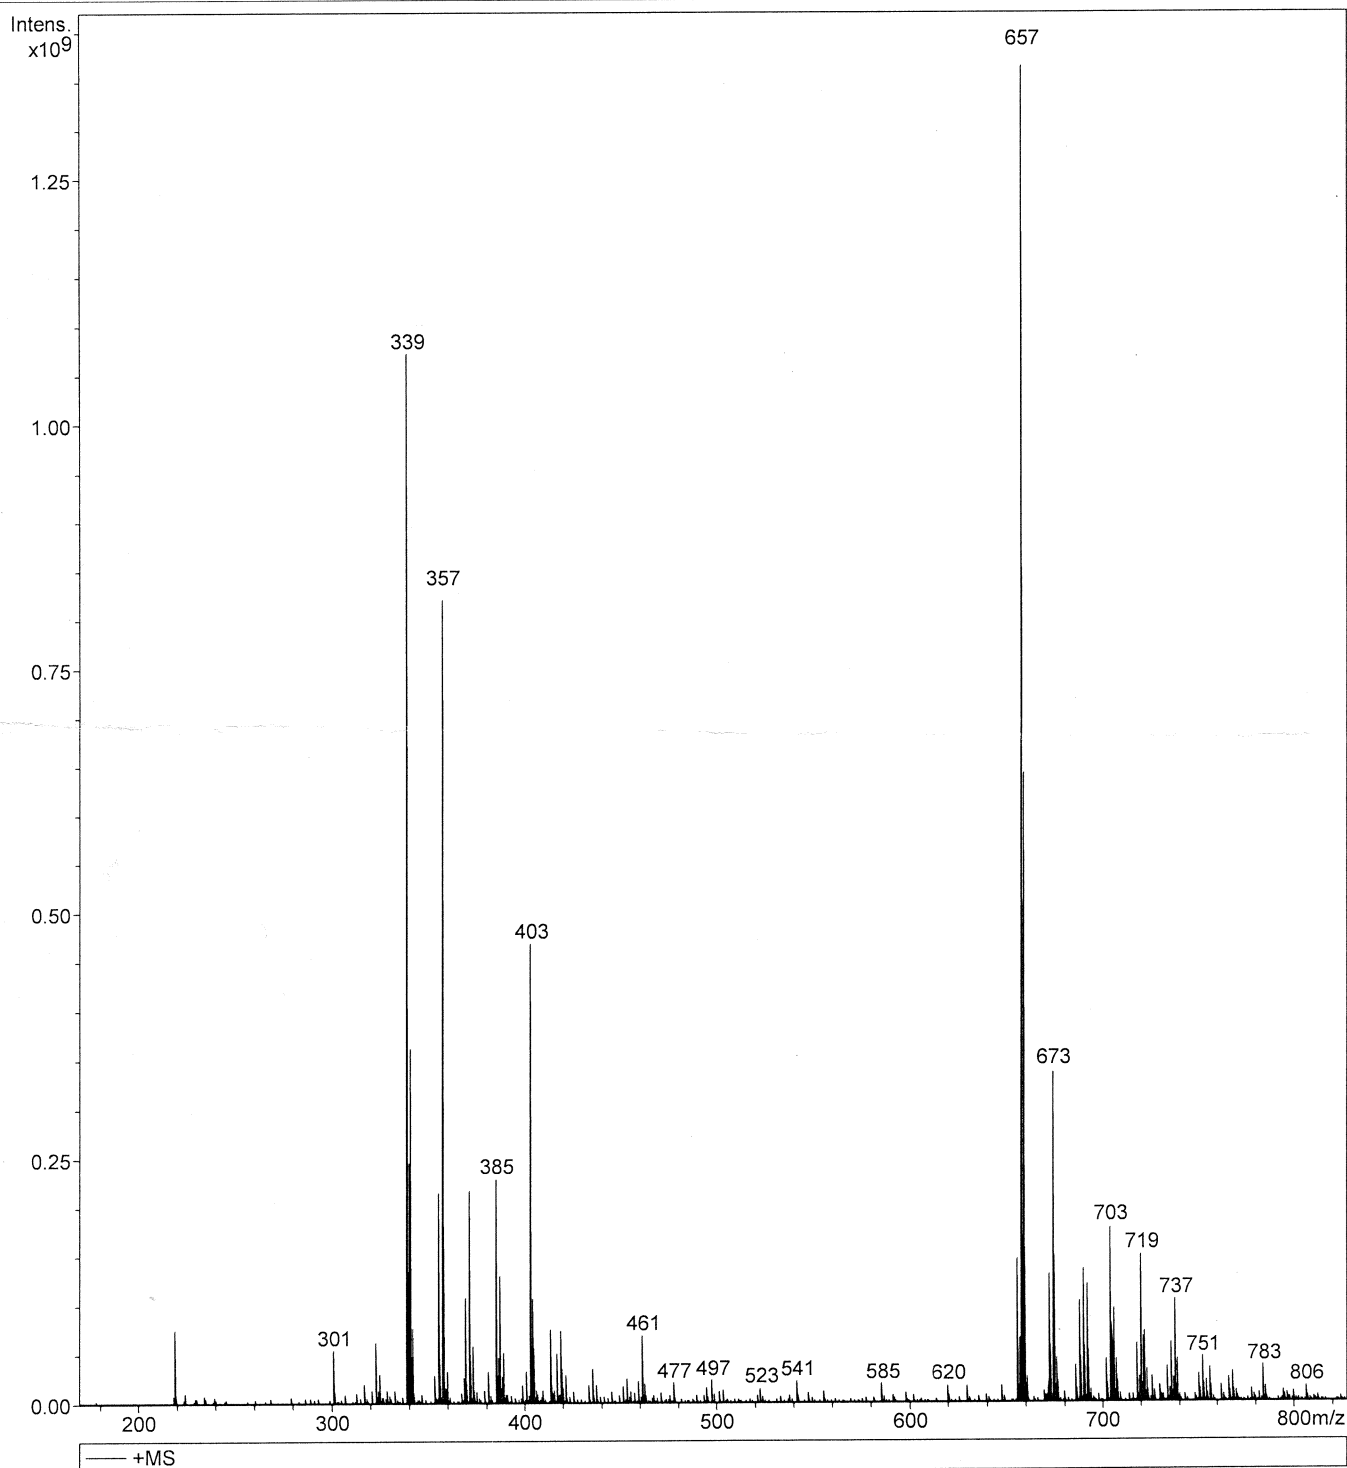

Figure S37. ESIMS of 6

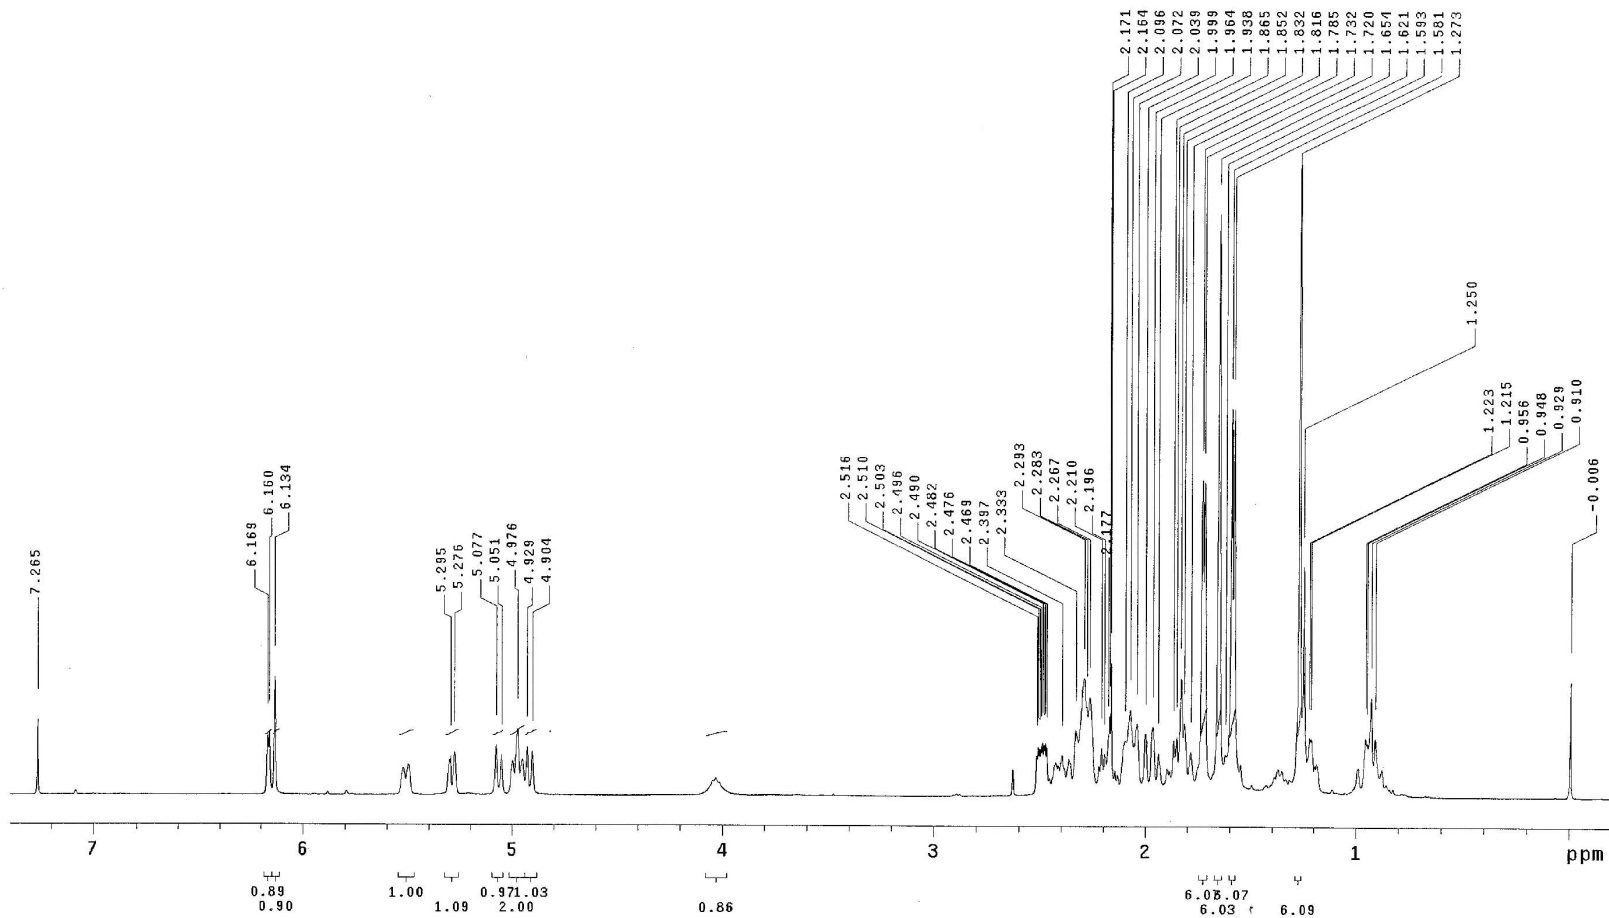

Figure S3:  $^1\text{H}$  NMR spectrum of **6** in  $\text{CDCl}_3$

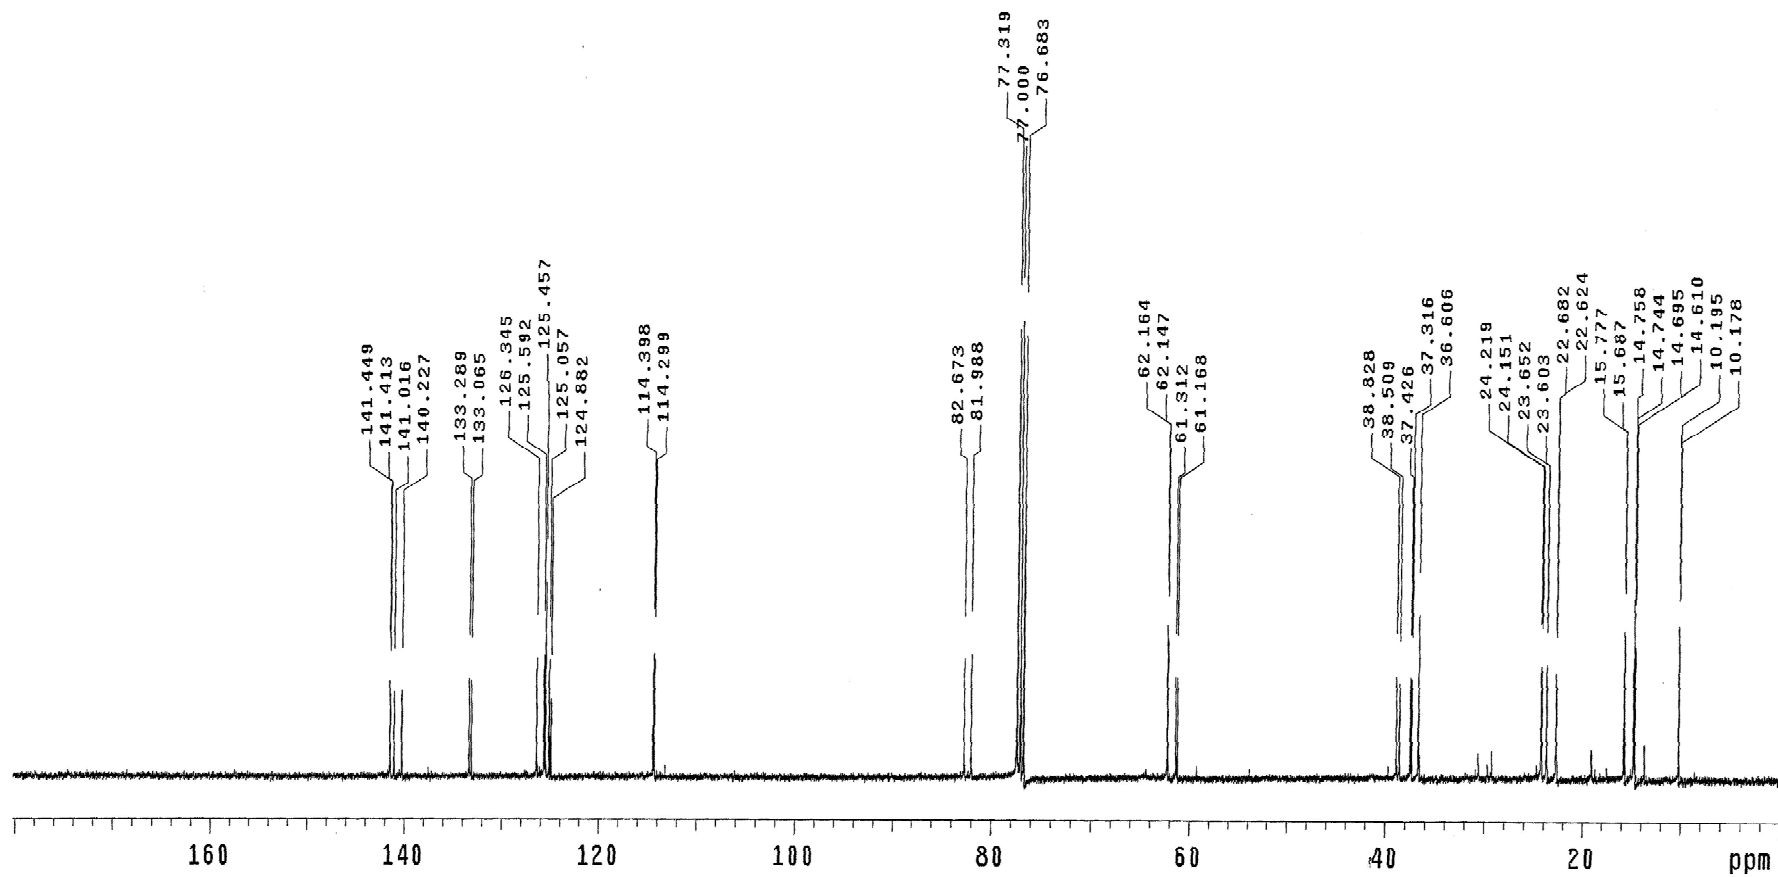

Figure S3;  $^{13}\text{C}$  NMR spectrum of **6** in  $\text{CDCl}_3$

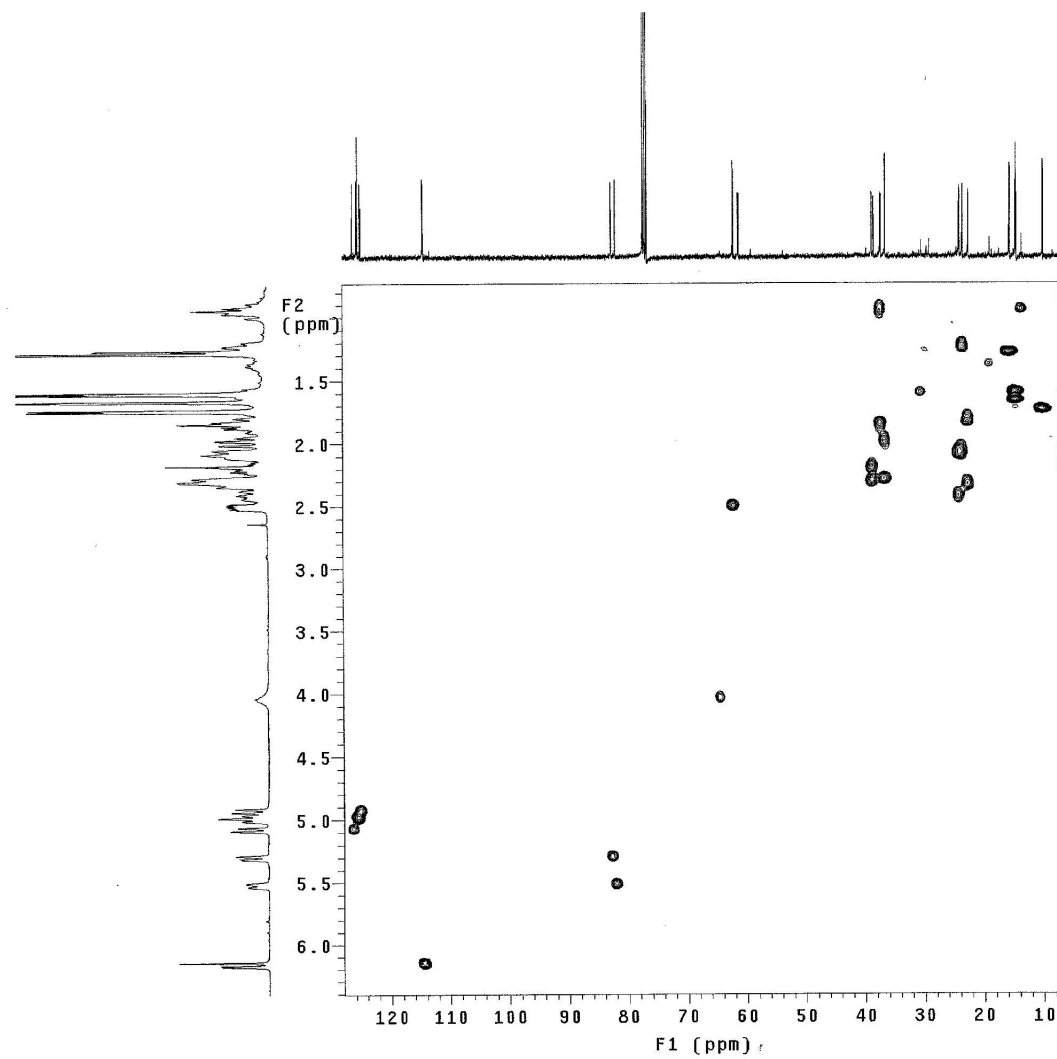

Figure S62. HSQC spectrum of 6 in CDCl<sub>3</sub>

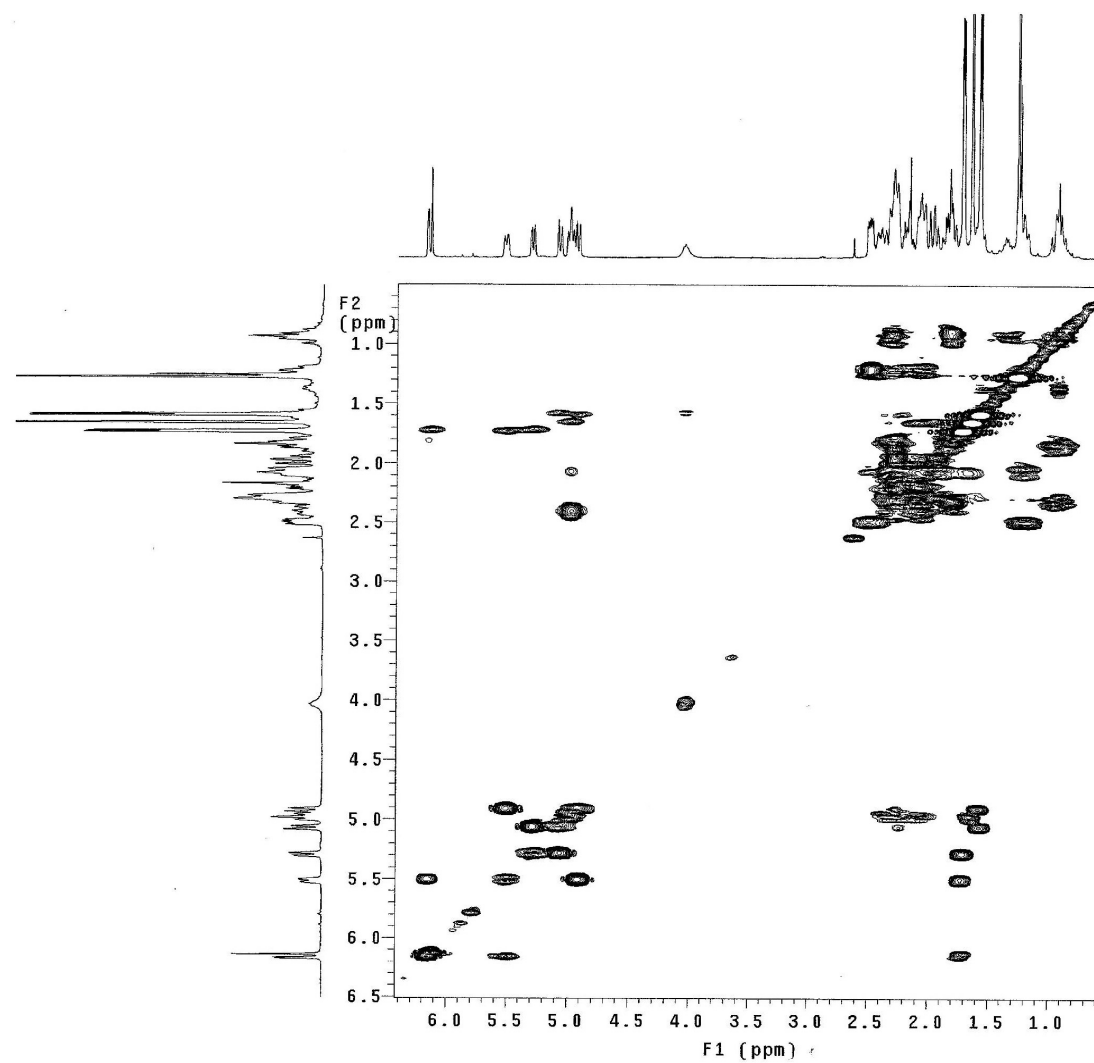

Figure S43.  $^1\text{H}$ - $^1\text{H}$  COSY spectrum of **6** in  $\text{CDCl}_3$



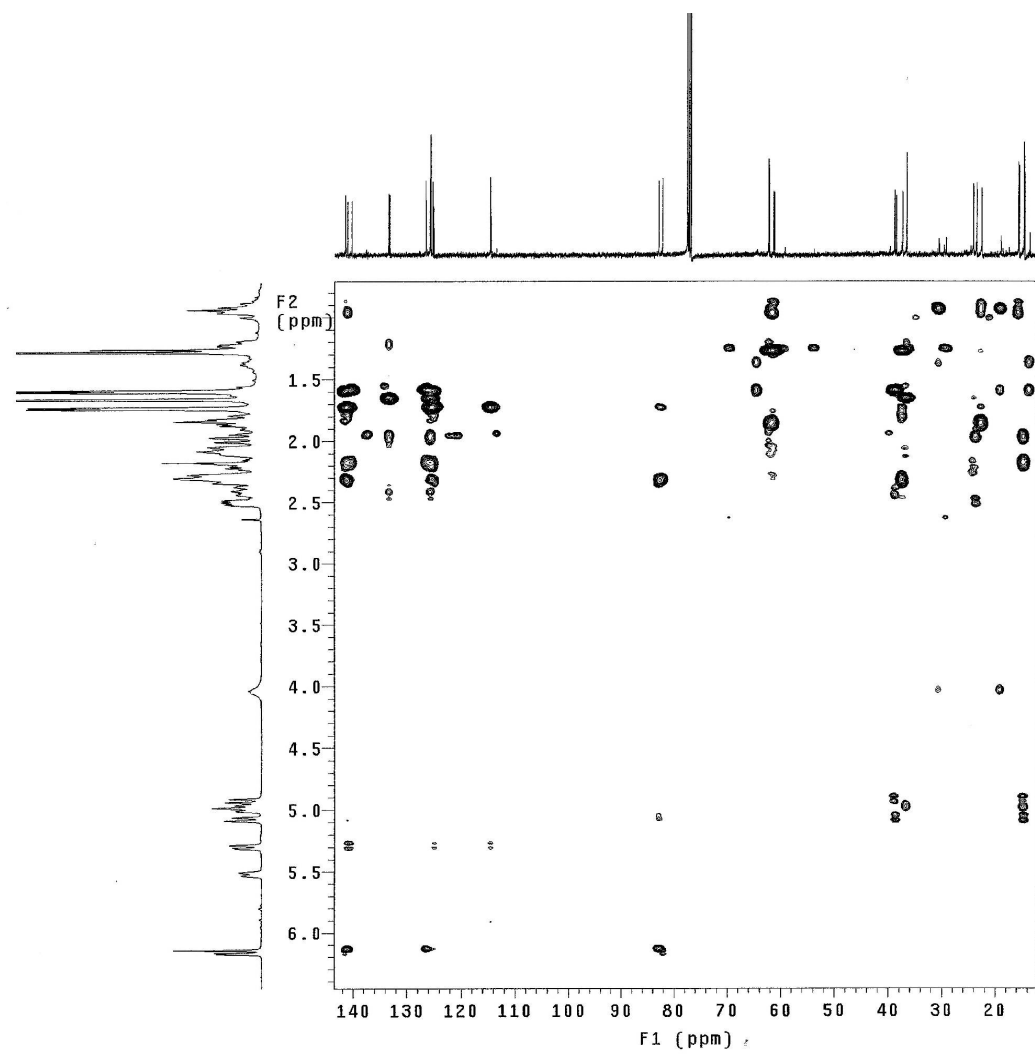

Figure S44 HMBC spectrum of 6 in CDCl<sub>3</sub>

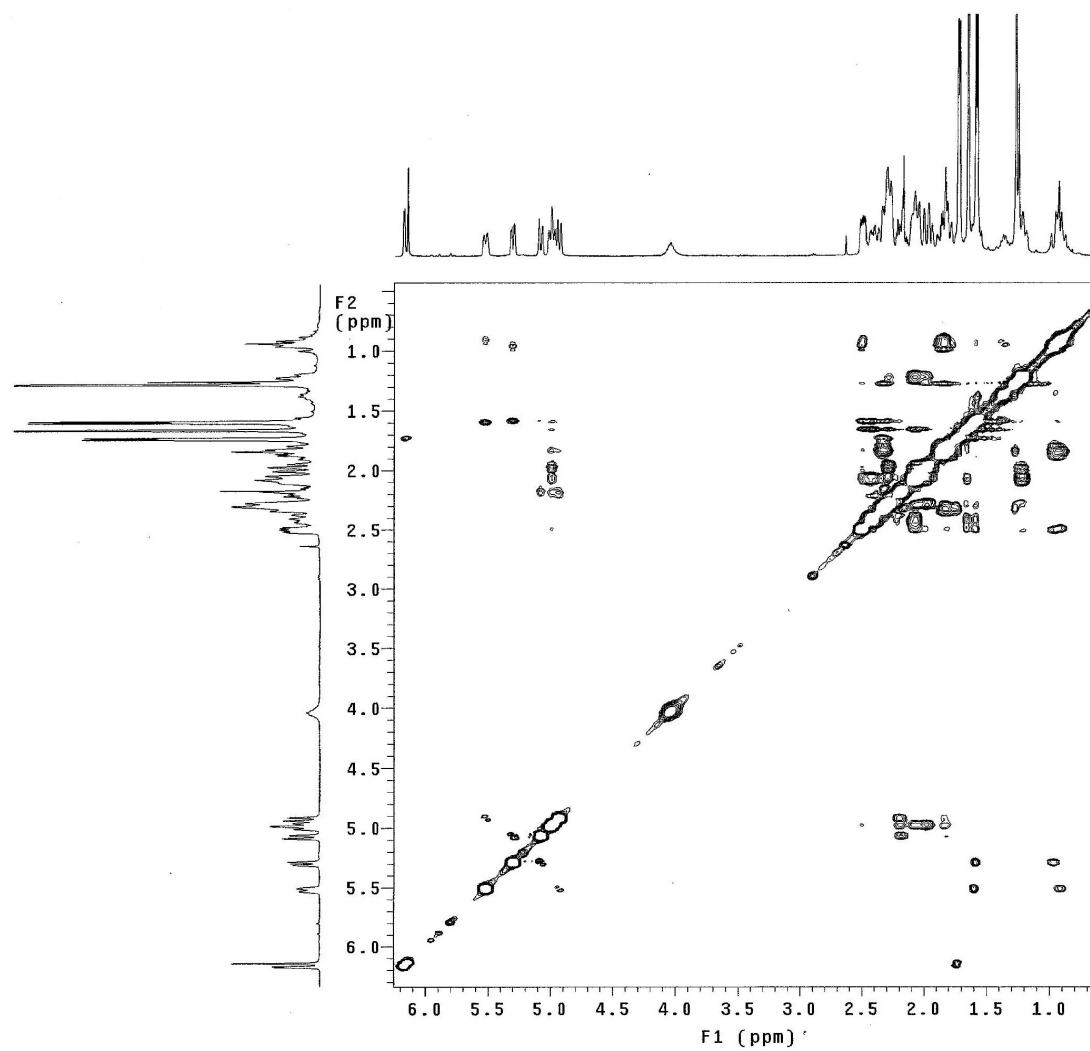

**Figure S43.** NOESY spectrum of **6** in CDCl<sub>3</sub>

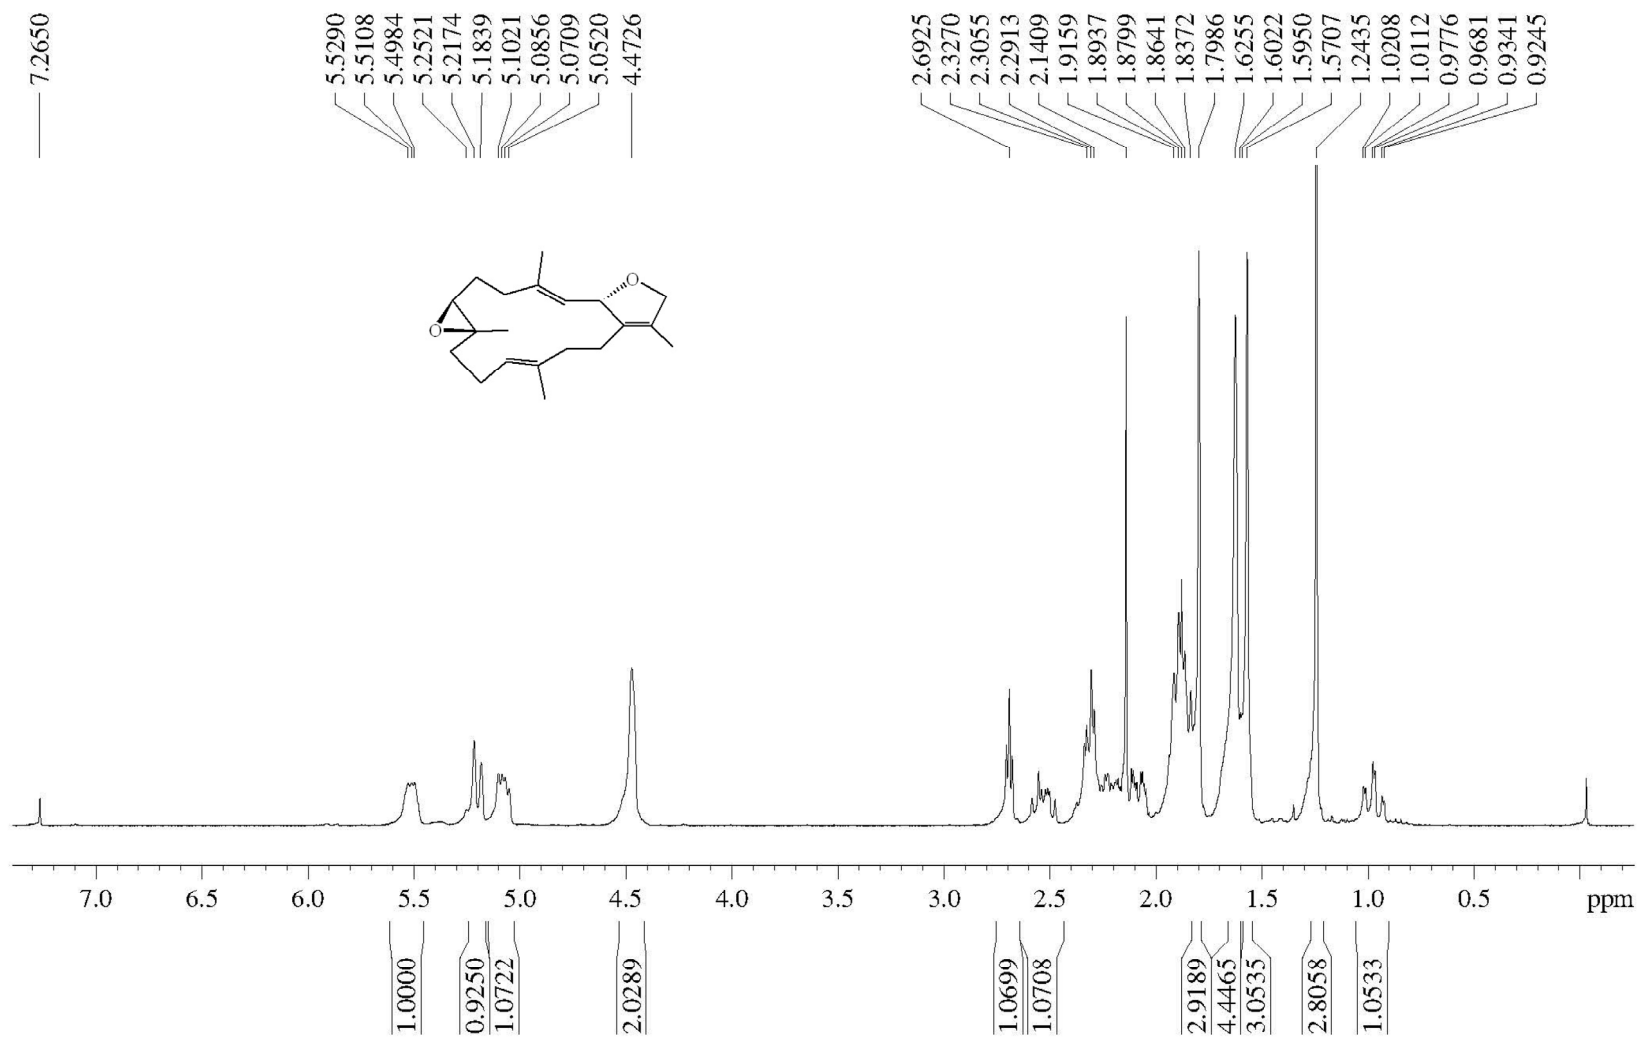

Figure S44. <sup>1</sup>H NMR spectrum of (+)-sarcophytoxide in CDCl<sub>3</sub> before treatment with acetone and silica gel under air

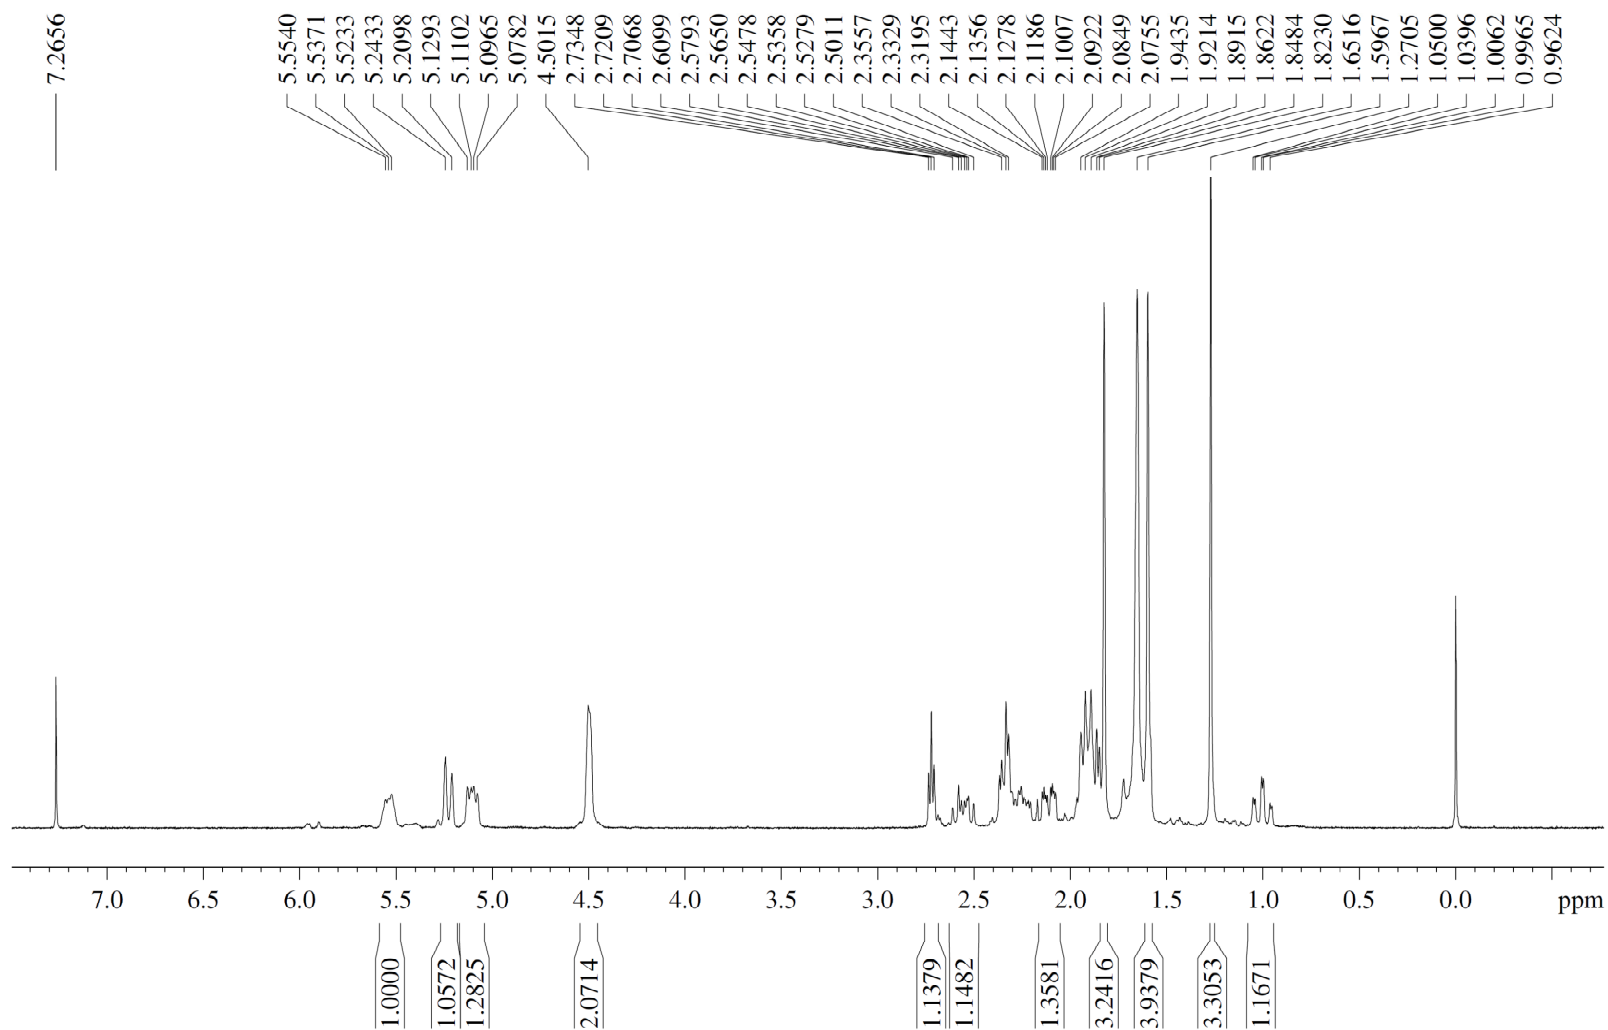

Figure S45.  $^1\text{H}$  NMR spectrum of (+)-sarcophytoxide in  $\text{CDCl}_3$  after treatment with acetone and silica gel under air

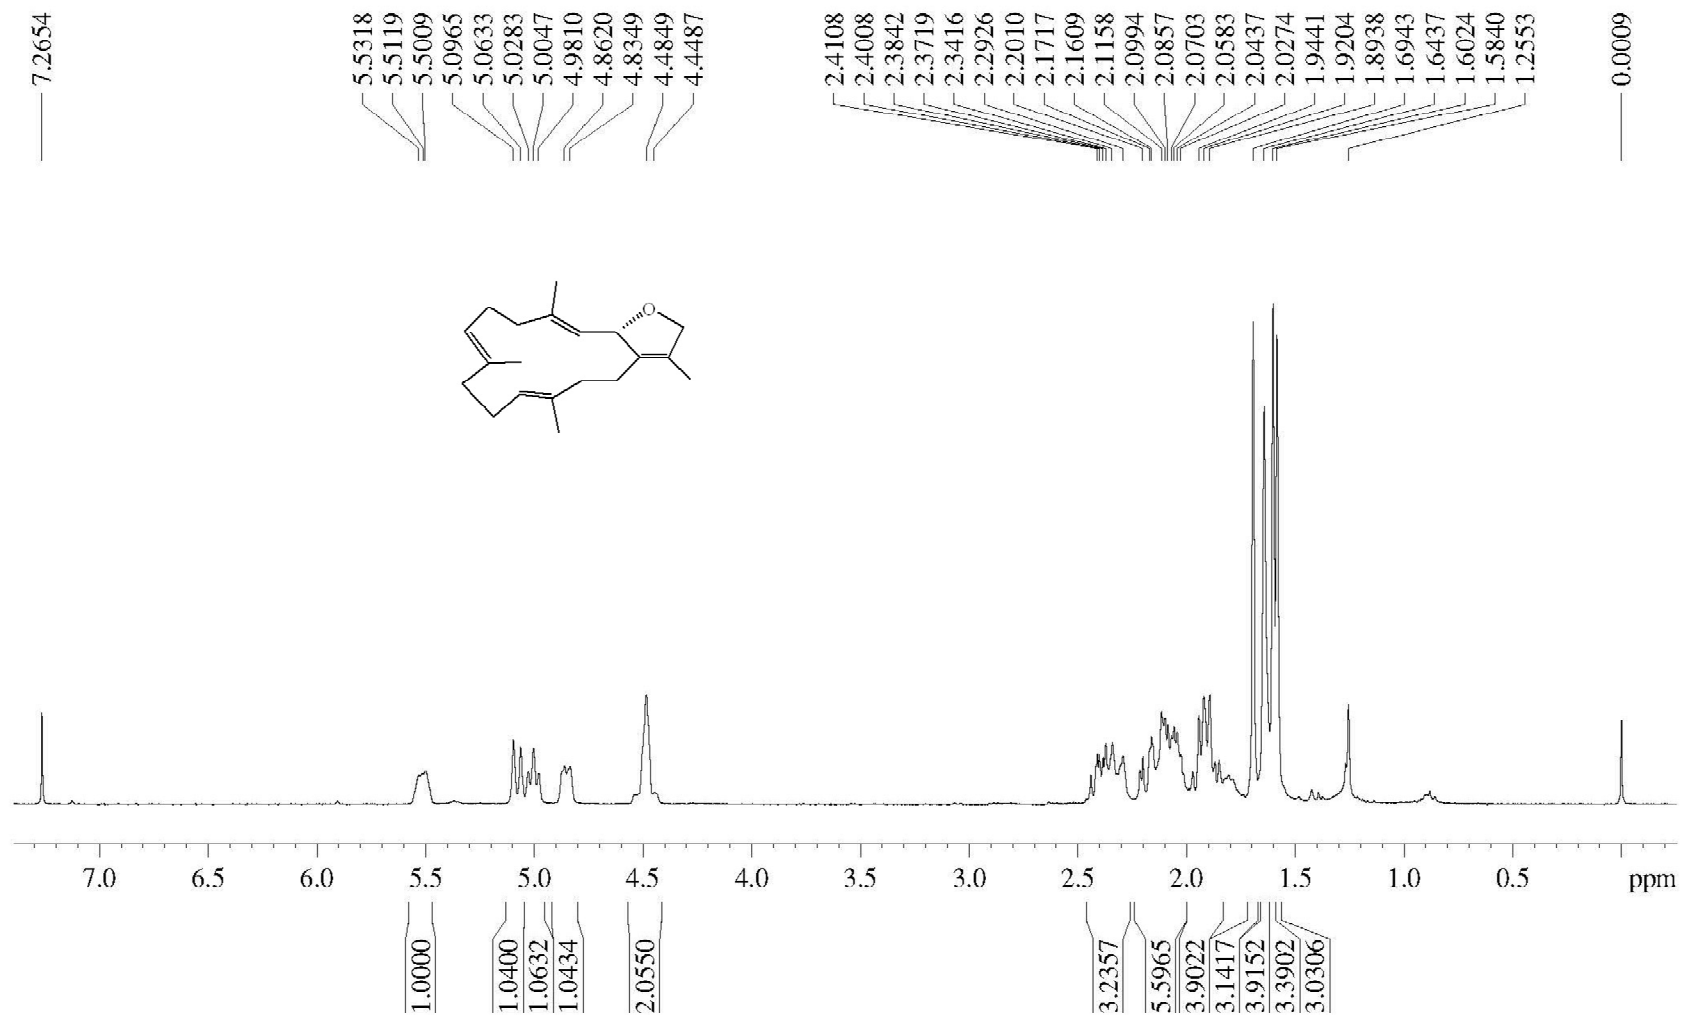

Figure S46. <sup>1</sup>H NMR spectrum of sarcophytonin A in CDCl<sub>3</sub> before treatment with acetone and silica gel under air

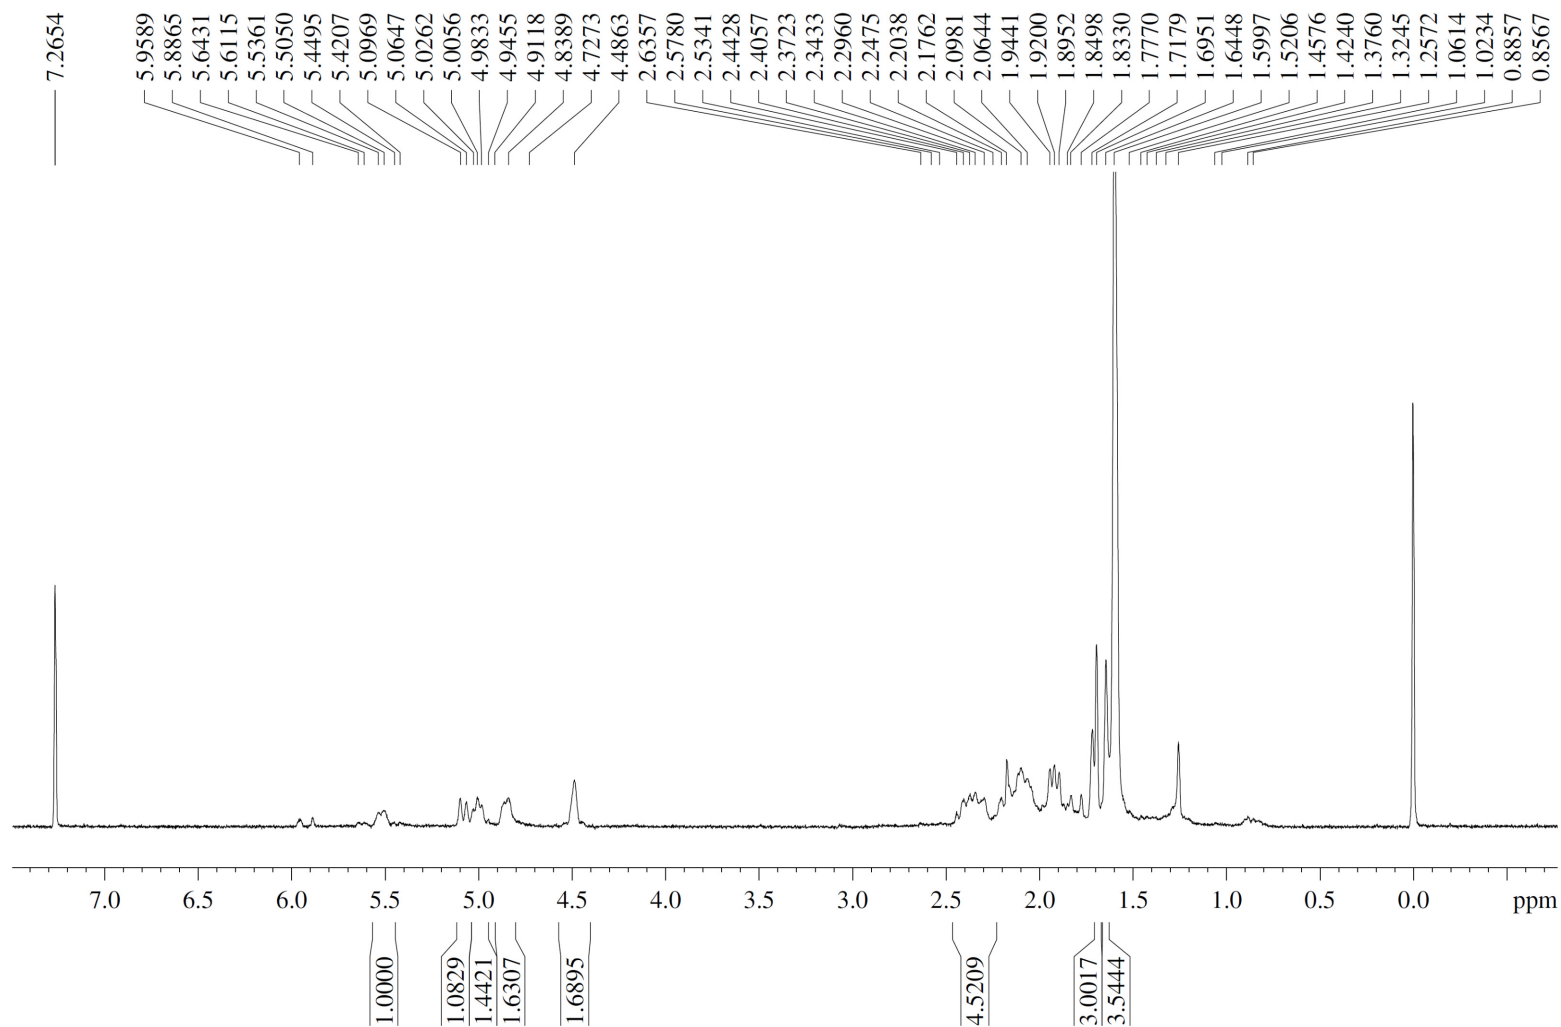

Figure S47.  $^1\text{H}$  NMR spectrum of sarcophytonin A in  $\text{CDCl}_3$  after treatment with acetone and silica gel under air
